# Supplementary material for: Quantification of Pathway Cross-talk Reveals Novel Synergistic Drug Combinations for Breast Cancer
Source: Oxford University Press journal article supplement (doi:10.1158/0008-5472.can-16-0097), 2016-11-22
Supplement: 00085472can160097-sup-160796_1_supp_3695051_hhhfst.xlsx [file 00085472can160097-sup-160796_1_supp_3695051_hhhfst.xlsx]

## Sheet: Sheet2
Drug 1			Drug 2			Crosstalking pathways mainly affected by a combination (CI ≥ 0.34)	Crosstalk inhibition (CI)
ID	Name	Class	ID	Name	Class		D1	D2	D1 & D2
DCL000583	Olaparib	PARPi	DCL001081	Dinaciclib	CDKi 1	hsa04064-hsa04151	1	0	1
DNC008718	ABT-888	PARPi	DCL001081	Dinaciclib	CDKi 1	hsa04064-hsa04151	1	0	1
DCL000500	BSI-201	PARPi	DCL001081	Dinaciclib	CDKi 1	hsa04064-hsa04151	1	0	1
DCL000583	Olaparib	PARPi	DCL000242	Tanespimycin	HSPi 1	hsa04064-hsa04621; hsa04064-hsa04151	0.701777	0.293728	0.881579
DNC008718	ABT-888	PARPi	DCL000242	Tanespimycin	HSPi 1	hsa04064-hsa04621; hsa04064-hsa04151	0.701777	0.293728	0.881579
DCL000500	BSI-201	PARPi	DCL000242	Tanespimycin	HSPi 1	hsa04064-hsa04621; hsa04064-hsa04151	0.701777	0.293728	0.881579
DB00481	Raloxifene	SERM	DCL000527	Figitumumab	IGFR1i	hsa04151-hsa04915; hsa04510-hsa04915; hsa04114-hsa04915; hsa04730-hsa04915; hsa04913-hsa04915; hsa04914-hsa04915; hsa04066-hsa04915	0.673279	0.215007	0.803279
DCL000527	Figitumumab	IGFR1i	DB00947	Fulvestrant	SERM	hsa04151-hsa04915; hsa04510-hsa04915; hsa04114-hsa04915; hsa04730-hsa04915; hsa04913-hsa04915; hsa04914-hsa04915; hsa04066-hsa04915	0.673279	0.145983	0.803279
DCL000527	Figitumumab	IGFR1i	DB00675	Tamoxifen	SERM	hsa04151-hsa04915; hsa04510-hsa04915; hsa04114-hsa04915; hsa04730-hsa04915; hsa04913-hsa04915; hsa04914-hsa04915; hsa04066-hsa04915	0.673279	0.215007	0.803279
DCL000527	Figitumumab	IGFR1i	DB00539	Toremifene	SERM	hsa04151-hsa04915; hsa04510-hsa04915; hsa04114-hsa04915; hsa04730-hsa04915; hsa04913-hsa04915; hsa04914-hsa04915; hsa04066-hsa04915	0.673279	0.145983	0.803279
DCL000527	Figitumumab	IGFR1i	DNC007422	Arzoxifene	SERM	hsa04151-hsa04915; hsa04510-hsa04915; hsa04114-hsa04915; hsa04730-hsa04915; hsa04913-hsa04915; hsa04914-hsa04915; hsa04066-hsa04915	0.673279	0.215007	0.803279
DCL000527	Figitumumab	IGFR1i	DB04575	Quinestrol	SH	hsa04151-hsa04915; hsa04510-hsa04915; hsa04114-hsa04915; hsa04730-hsa04915; hsa04913-hsa04915; hsa04914-hsa04915; hsa04066-hsa04915	0.673279	0.215007	0.803279
DCL001075	PD-0332991	CDKi 2	DCL000110	Exherin	N-Cad	hsa04530-hsa04514; hsa04151-hsa04514	0.766942	0	0.766942
DCL000583	Olaparib	PARPi	DCL001075	PD-0332991	CDKi 2	hsa04530-hsa04514; hsa04151-hsa04514	0.459182	0.279284	0.724061
DNC008718	ABT-888	PARPi	DCL001075	PD-0332991	CDKi 2	hsa04530-hsa04514; hsa04151-hsa04514	0.459182	0.279284	0.724061
DCL000500	BSI-201	PARPi	DCL001075	PD-0332991	CDKi 2	hsa04530-hsa04514; hsa04151-hsa04514	0.459182	0.279284	0.724061
DB06287	Temsirolimus	mTOR	DB01590	Everolimus	mTOR	hsa04920-hsa04910; hsa04920-hsa04150; hsa04920-hsa04151; hsa04910-hsa04150; hsa04910-hsa04066; hsa04150-hsa04151; hsa04150-hsa04012; hsa04150-hsa04066; hsa04151-hsa04066	0.6155	0.6155	0.6155
DB00530	Erlotinib	EGFRi	DB08875	Cabozantinib	MTKi 3	hsa04320-hsa04370; hsa04151-hsa04060; hsa04151-hsa04370; hsa04060-hsa04370; hsa04912-hsa04151; hsa04912-hsa04370; hsa04540-hsa04151; hsa04540-hsa04060; hsa04540-hsa04370; hsa04066-hsa04151; hsa04066-hsa04060; hsa04066-hsa04370; hsa04915-hsa04370; hsa04010-hsa04370; hsa04012-hsa04151; hsa04012-hsa04060; hsa04012-hsa04370; hsa04020-hsa04370; hsa04810-hsa04370	0.259938	0.336414	0.596985
DB00317	Gefitinib	EGFRi	DB08875	Cabozantinib	MTKi 3	hsa04320-hsa04370; hsa04151-hsa04060; hsa04151-hsa04370; hsa04060-hsa04370; hsa04912-hsa04151; hsa04912-hsa04370; hsa04540-hsa04151; hsa04540-hsa04060; hsa04540-hsa04370; hsa04066-hsa04151; hsa04066-hsa04060; hsa04066-hsa04370; hsa04915-hsa04370; hsa04010-hsa04370; hsa04012-hsa04151; hsa04012-hsa04060; hsa04012-hsa04370; hsa04020-hsa04370; hsa04810-hsa04370	0.259938	0.336414	0.596985
DCL000486	AZD8931	HER2	DB00317	Gefitinib	EGFRi	hsa04510-hsa04012; hsa04012-hsa04320; hsa04012-hsa04060; hsa04012-hsa04912; hsa04012-hsa04066; hsa04012-hsa04915;hsa04012-hsa04010; hsa04012-hsa04020; hsa04020-hsa04912; hsa04066-hsa04915	0.324963	0.284886	0.513894
DB06366	Pertuzumab	HER2	DB00317	Gefitinib	EGFRi	hsa04510-hsa04012; hsa04012-hsa04320; hsa04012-hsa04060; hsa04012-hsa04912; hsa04012-hsa04066; hsa04012-hsa04915;hsa04012-hsa04010; hsa04012-hsa04020; hsa04020-hsa04912; hsa04066-hsa04915	0.324963	0.284886	0.513894
DCL000486	AZD8931	HER2	DB00530	Erlotinib	EGFRi	hsa04510-hsa04012; hsa04012-hsa04320; hsa04012-hsa04060; hsa04012-hsa04912; hsa04012-hsa04066; hsa04012-hsa04915;hsa04012-hsa04010; hsa04012-hsa04020; hsa04020-hsa04912; hsa04066-hsa04915	0.324963	0.284886	0.513894
DB06366	Pertuzumab	HER2	DB00530	Erlotinib	EGFRi	hsa04510-hsa04012; hsa04012-hsa04320; hsa04012-hsa04060; hsa04012-hsa04912; hsa04012-hsa04066; hsa04012-hsa04915;hsa04012-hsa04010; hsa04012-hsa04020; hsa04020-hsa04912; hsa04066-hsa04915	0.324963	0.284886	0.513894
DB08875	Cabozantinib	MTKi 3	DB00072	Trastuzumab	HER2	hsa04151-hsa04510; hsa04151-hsa04012; 0 hsa04151-hsa04066; hsa04510-hsa04012; hsa04510-hsa04520; hsa04510-hsa04066; hsa04060-hsa04510; hsa04060-hsa04066; hsa04370-hsa04510; hsa04370-hsa04012; hsa04370-hsa04020; hsa04370-hsa04066	0.310641	0.255095	0.568289
DB08875	Cabozantinib	MTKi 3	DCL000486	AZD8931	HER2	hsa04151-hsa04510; hsa04151-hsa04012; 0 hsa04151-hsa04066; hsa04510-hsa04012; hsa04510-hsa04520; hsa04510-hsa04066; hsa04060-hsa04510; hsa04060-hsa04066; hsa04370-hsa04510; hsa04370-hsa04012; hsa04370-hsa04020; hsa04370-hsa04066	0.317641	0.255095	0.568289
DB08875	Cabozantinib	MTKi 3	DB06366	Pertuzumab	HER2	hsa04151-hsa04510; hsa04151-hsa04012; 0 hsa04151-hsa04066; hsa04510-hsa04012; hsa04510-hsa04520; hsa04510-hsa04066; hsa04060-hsa04510; hsa04060-hsa04066; hsa04370-hsa04510; hsa04370-hsa04012; hsa04370-hsa04020; hsa04370-hsa04066	0.317641	0.255095	0.568289
DNC004815	Neratinib	EGFRi 3	DB01259	Lapatinib	EGFRi 2	hsa04320-hsa04915; hsa04320-hsa04012; hsa04151-hsa04912; hsa04151-hsa04066; hsa04060-hsa04066; hsa04060-hsa04012; hsa04370-hsa04320; hsa04370-hsa04151; hsa04370-hsa04060; hsa04370-hsa04912; hsa04370-hsa04540; hsa04370-hsa04066; hsa04370-hsa04915; hsa04370-hsa04010; hsa04370-hsa04012; hsa04370-hsa04020; hsa04370-hsa04810; hsa04912-hsa04066; hsa04912-hsa04915; hsa04912-hsa04012; hsa04540-hsa04066; …	0.274103	0.284982	0.535713
DNC004815	Neratinib	EGFRi 3	DB08916	Afatinib	EGFRi 2	hsa04320-hsa04915; hsa04320-hsa04012; hsa04151-hsa04912; hsa04151-hsa04066; hsa04060-hsa04066; hsa04060-hsa04012; hsa04370-hsa04320; hsa04370-hsa04151; hsa04370-hsa04060; hsa04370-hsa04912; hsa04370-hsa04540; hsa04370-hsa04066; hsa04370-hsa04915; hsa04370-hsa04010; hsa04370-hsa04012; hsa04370-hsa04020; hsa04370-hsa04810; hsa04912-hsa04066; hsa04912-hsa04915; hsa04912-hsa04012; hsa04540-hsa04066; …	0.274103	0.284982	0.535713
DCL000350	Vandetanib	EGFRi 3	DB01259	Lapatinib	EGFRi 2	hsa04320-hsa04915; hsa04320-hsa04012; hsa04151-hsa04912; hsa04151-hsa04066; hsa04060-hsa04066; hsa04060-hsa04012; hsa04370-hsa04320; hsa04370-hsa04151; hsa04370-hsa04060; hsa04370-hsa04912; hsa04370-hsa04540; hsa04370-hsa04066; hsa04370-hsa04915; hsa04370-hsa04010; hsa04370-hsa04012; hsa04370-hsa04020; hsa04370-hsa04810; hsa04912-hsa04540; hsa04912-hsa04066; hsa04912-hsa04915; hsa04912-hsa04012; …	0.274103	0.284982	0.535713
DCL000350	Vandetanib	EGFRi 3	DB08916	Afatinib	EGFRi 2	hsa04320-hsa04915; hsa04320-hsa04012; hsa04151-hsa04912; hsa04151-hsa04066; hsa04060-hsa04066; hsa04060-hsa04012; hsa04370-hsa04320; hsa04370-hsa04151; hsa04370-hsa04060; hsa04370-hsa04912; hsa04370-hsa04540; hsa04370-hsa04066; hsa04370-hsa04915; hsa04370-hsa04010; hsa04370-hsa04012; hsa04370-hsa04020; hsa04370-hsa04810; hsa04912-hsa04540; hsa04912-hsa04066; hsa04912-hsa04915; hsa04912-hsa04012; …	0.274103	0.284982	0.535713
DCL000486	AZD8931	HER2	DNC004815	Neratinib	EGFRi 3	hsa04510-hsa04012; hsa04012-hsa04320; hsa04012-hsa04060; hsa04012-hsa04370; hsa04012-hsa04912; hsa04012-hsa04066; hsa04012-hsa04915;hsa04012-hsa04010; hsa04012-hsa04020; hsa04020-hsa04370; hsa04020-hsa04912; hsa04066-hsa04370; hsa04066-hsa04915	0.301918	0.346898	0.53045
DB06366	Pertuzumab	HER2	DNC004815	Neratinib	EGFRi 3	hsa04510-hsa04012; hsa04012-hsa04320; hsa04012-hsa04060; hsa04012-hsa04370; hsa04012-hsa04912; hsa04012-hsa04066; hsa04012-hsa04915;hsa04012-hsa04010; hsa04012-hsa04020; hsa04020-hsa04370; hsa04020-hsa04912; hsa04066-hsa04370; hsa04066-hsa04915	0.301918	0.346898	0.53045
DB00072	Trastuzumab	HER2	DCL000578	Motesanib	MTKi 4	hsa04510-hsa04370; hsa04510-hsa04810; hsa04012-hsa04370; hsa04012-hsa04810; hsa04020-hsa04370; hsa04066-hsa04060; hsa04066-hsa04370	0.0192116	0.0626411	0.529433
DB01259	Lapatinib	EGFRi 2	DB08916	Afatinib	EGFRi 2	hsa04320-hsa04912; hsa04320-hsa04915; hsa04320-hsa04012; hsa04151-hsa04912; hsa04151-hsa04066; hsa04151-hsa04915; hsa04060-hsa04066; hsa04060-hsa04012; hsa04912-hsa04540; hsa04912-hsa04066; hsa04912-hsa04915; hsa04912-hsa04012; hsa04912-hsa04020; hsa04540-hsa04066; hsa04540-hsa04915; hsa04540-hsa04012; hsa04540-hsa04810; hsa04066-hsa04915; hsa04066-hsa04010; hsa04066-hsa04012; hsa04915-hsa04010; …	0.527736	0.527736	0.527736
DNC004815	Neratinib	EGFRi 3	DB00317	Gefitinib	EGFRi	hsa04320-hsa04012; hsa04151-hsa04012; hsa04060-hsa04066; hsa04060-hsa04012; hsa04370-hsa04320; hsa04370-hsa04151; hsa04370-hsa04060; hsa04370-hsa04912; hsa04370-hsa04540; hsa04370-hsa04066; hsa04370-hsa04915; hsa04370-hsa04010; hsa04370-hsa04012; hsa04370-hsa04020; hsa04370-hsa04810; hsa04912-hsa04066; hsa04912-hsa04012; hsa04912-hsa04020; hsa04540-hsa04066; hsa04540-hsa04915; hsa04540-hsa04012; …	0.254103	0.269608	0.523711
DNC004815	Neratinib	EGFRi 3	DB00530	Erlotinib	EGFRi	hsa04320-hsa04012; hsa04151-hsa04012; hsa04060-hsa04066; hsa04060-hsa04012; hsa04370-hsa04320; hsa04370-hsa04151; hsa04370-hsa04060; hsa04370-hsa04912; hsa04370-hsa04540; hsa04370-hsa04066; hsa04370-hsa04915; hsa04370-hsa04010; hsa04370-hsa04012; hsa04370-hsa04020; hsa04370-hsa04810; hsa04912-hsa04066; hsa04912-hsa04012; hsa04912-hsa04020; hsa04540-hsa04066; hsa04540-hsa04915; hsa04540-hsa04012; …	0.254103	0.269608	0.523711
DB00317	Gefitinib	EGFRi	DB01259	Lapatinib	EGFRi 2	hsa04320-hsa04912; hsa04320-hsa04915; hsa04320-hsa04012; hsa04151-hsa04912; hsa04151-hsa04066; hsa04060-hsa04066; hsa04060-hsa04012; hsa04912-hsa04066; hsa04912-hsa04012; hsa04912-hsa04020; hsa04540-hsa04066; hsa04540-hsa04915; hsa04540-hsa04012; hsa04540-hsa04810; 0.20563462298355 hsa04066-hsa04915; hsa04066-hsa04010; hsa04066-hsa04012; hsa04915-hsa04010; hsa04915-hsa04012; hsa04915-hsa04020; hs…	0.265232	0.281429	0.523411
DB00530	Erlotinib	EGFRi	DB08916	Afatinib	EGFRi 2	hsa04320-hsa04912; hsa04320-hsa04915; hsa04320-hsa04012; hsa04151-hsa04912; hsa04151-hsa04066; hsa04060-hsa04066; hsa04060-hsa04012; hsa04912-hsa04066; hsa04912-hsa04012; hsa04912-hsa04020; hsa04540-hsa04066; hsa04540-hsa04915; hsa04540-hsa04012; hsa04540-hsa04810; 0.20563462298355 hsa04066-hsa04915; hsa04066-hsa04010; hsa04066-hsa04012; hsa04915-hsa04010; hsa04915-hsa04012; hsa04915-hsa04020; hs…	0.265232	0.281429	0.523411
DB00317	Gefitinib	EGFRi	DB08916	Afatinib	EGFRi 2	hsa04320-hsa04912; hsa04320-hsa04915; hsa04320-hsa04012; hsa04151-hsa04912; hsa04151-hsa04066; hsa04060-hsa04066; hsa04060-hsa04012; hsa04912-hsa04066; hsa04912-hsa04012; hsa04912-hsa04020; hsa04540-hsa04066; hsa04540-hsa04915; hsa04540-hsa04012; hsa04540-hsa04810; 0.20563462298355 hsa04066-hsa04915; hsa04066-hsa04010; hsa04066-hsa04012; hsa04915-hsa04010; hsa04915-hsa04012; hsa04915-hsa04020; hs…	0.265232	0.281429	0.523411
DB00530	Erlotinib	EGFRi	DB01259	Lapatinib	EGFRi 2	hsa04320-hsa04912; hsa04320-hsa04915; hsa04320-hsa04012; hsa04151-hsa04912; hsa04151-hsa04066; hsa04060-hsa04066; hsa04060-hsa04012; hsa04912-hsa04066; hsa04912-hsa04012; hsa04912-hsa04020; hsa04540-hsa04066; hsa04540-hsa04915; hsa04540-hsa04012; hsa04540-hsa04810; 0.20563462298355 hsa04066-hsa04915; hsa04066-hsa04010; hsa04066-hsa04012; hsa04915-hsa04010; hsa04915-hsa04012; hsa04915-hsa04020; hs…	0.265232	0.281429	0.523411
DNC004815	Neratinib	EGFRi 3	DCL000350	Vandetanib	EGFRi 3	hsa04320-hsa04370; hsa04320-hsa04915; hsa04320-hsa04012; hsa04151-hsa04370; hsa04151-hsa04912; hsa04060-hsa04370; hsa04060-hsa04066; hsa04060-hsa04012; hsa04370-hsa04912; hsa04370-hsa04540; hsa04370-hsa04066; hsa04370-hsa04915; hsa04370-hsa04010; hsa04370-hsa04012; hsa04370-hsa04020; hsa04370-hsa04810; hsa04912-hsa04066; hsa04912-hsa04915; hsa04912-hsa04012; hsa04912-hsa04020; hsa04540-hsa04066; …	0.252215	0.276337	0.518821
DB00317	Gefitinib	EGFRi	DB00530	Erlotinib	EGFRi	hsa04320-hsa04540; hsa04320-hsa04915; hsa04320-hsa04012; hsa04151-hsa04912; hsa04151-hsa04066; hsa04151-hsa04012; hsa04060-hsa04012; hsa04912-hsa04540; hsa04912-hsa04915; hsa04912-hsa04012; hsa04912-hsa04020; hsa04540-hsa04066; hsa04540-hsa04915; hsa04540-hsa04012; hsa04066-hsa04915; hsa04066-hsa04012; hsa04915-hsa04010; hsa04915-hsa04012; hsa04915-hsa04020; hsa04915-hsa04810; hsa04010-hsa04012; …	0.517372	0.517372	0.517372
DCL000486	AZD8931	HER2	DB01259	Lapatinib	EGFRi 2	hsa04510-hsa04012; hsa04012-hsa04320; hsa04012-hsa04060; hsa04012-hsa04912; hsa04012-hsa04066; hsa04012-hsa04915; hsa04012-hsa04010; hsa04012-hsa04020; hsa04020-hsa04912; hsa04066-hsa04915	0.260496	0.335582	0.513894
DCL000486	AZD8931	HER2	DB08916	Afatinib	EGFRi 2	hsa04510-hsa04012; hsa04012-hsa04320; hsa04012-hsa04060; hsa04012-hsa04912; hsa04012-hsa04066; hsa04012-hsa04915; hsa04012-hsa04010; hsa04012-hsa04020; hsa04012-hsa04810; hsa04020-hsa04912; hsa04066-hsa04915	0.260496	0.335582	0.513894
DB06366	Pertuzumab	HER2	DB01259	Lapatinib	EGFRi 2	hsa04510-hsa04012; hsa04012-hsa04320; hsa04012-hsa04060; hsa04012-hsa04912; hsa04012-hsa04066; hsa04012-hsa04915; hsa04012-hsa04010; hsa04012-hsa04020; hsa04020-hsa04912; hsa04066-hsa04915	0.260496	0.335582	0.513894
DB06366	Pertuzumab	HER2	DB08916	Afatinib	EGFRi 2	hsa04510-hsa04012; hsa04012-hsa04320; hsa04012-hsa04060; hsa04012-hsa04912; hsa04012-hsa04066; hsa04012-hsa04915; hsa04012-hsa04010; hsa04012-hsa04020; hsa04012-hsa04810; hsa04020-hsa04912; hsa04066-hsa04915	0.260496	0.335582	0.513894
DB06287	Temsirolimus	mTOR	DCL001085	BEZ235	mTOR/PI3K	hsa04920-hsa04910; hsa04910-hsa04066; hsa04910-hsa04660; hsa04910-hsa04664; hsa04910-hsa04662; hsa04910-hsa04150; hsa04910-hsa04370; hsa04910-hsa04914; hsa04910-hsa04960; hsa04150-hsa04066; hsa04150-hsa04660; hsa04150-hsa04664; hsa04150-hsa04722; hsa04150-hsa04960; hsa04150-hsa04012; hsa04066-hsa04664; hsa04066-hsa04810; hsa04066-hsa04370	0.266638	0.275534	0.513386
DB06287	Temsirolimus	mTOR	DCL001086	BGT226	mTOR/PI3K	hsa04920-hsa04910; hsa04920-hsa04150; hsa04910-hsa04066; hsa04910-hsa04150; hsa04910-hsa04370; hsa04910-hsa04210; hsa04910-hsa04012; hsa04150-hsa04660; hsa04150-hsa04664; hsa04150-hsa04722; hsa04150-hsa04151; hsa04150-hsa04510; hsa04150-hsa04960; hsa04150-hsa04012; hsa04012-hsa04380; hsa04012-hsa04725; hsa04012-hsa04630; hsa04066-hsa04380; hsa04066-hsa04662; hsa04066-hsa04668; hsa04066-hsa04810; …	0.365667	0.2686	0.513386
DB01590	Everolimus	mTOR	DCL001086	BGT226	mTOR/PI3K	hsa04920-hsa04910; hsa04920-hsa04150; hsa04910-hsa04066; hsa04910-hsa04150; hsa04910-hsa04370; hsa04910-hsa04210; hsa04910-hsa04012; hsa04150-hsa04660; hsa04150-hsa04664; hsa04150-hsa04722; hsa04150-hsa04151; hsa04150-hsa04510; hsa04150-hsa04960; hsa04150-hsa04012; hsa04012-hsa04380; hsa04012-hsa04725; hsa04012-hsa04630; hsa04066-hsa04380; hsa04066-hsa04662; hsa04066-hsa04668; hsa04066-hsa04810; …	0.365667	0.2686	0.513386
DCL000578	Motesanib	MTKi 4	DB01259	Lapatinib	EGFRi 2	hsa04010-hsa04915; hsa04010-hsa04012; hhsa04151-hsa04912; hsa04151-hsa04540; hsa04151-hsa04066; hsa04151-hsa04915; 0.208431860229801 hsa04151-hsa04012; hsa04020-hsa04012; hsa04916-hsa04151; hsa04916-hsa04060; hsa04916-hsa04915; hsa04060-hsa04540; hsa04060-hsa04066; hsa04060-hsa04012; hsa04370-hsa04320; hsa04370-hsa04151; hsa04370-hsa04060; hsa04370-hsa04912; hsa04370-hsa04540; hsa04370-hsa04066; …	0.270319	0.234208	0.513315
DCL000578	Motesanib	MTKi 4	DB08916	Afatinib	EGFRi 2	hsa04010-hsa04915; hsa04010-hsa04012; hhsa04151-hsa04912; hsa04151-hsa04540; hsa04151-hsa04066; hsa04151-hsa04915; 0.208431860229801 hsa04151-hsa04012; hsa04020-hsa04012; hsa04916-hsa04151; hsa04916-hsa04060; hsa04916-hsa04915; hsa04060-hsa04540; hsa04060-hsa04066; hsa04060-hsa04012; hsa04370-hsa04320; hsa04370-hsa04151; hsa04370-hsa04060; hsa04370-hsa04912; hsa04370-hsa04540; hsa04370-hsa04066; …	0.270319	0.234208	0.513315
DCL000357	SU-14813	MTKi 2	DCL000354	Cediranib	MTKi 2	hsa04151-hsa04370; hsa04510-hsa04370; hsa04060-hsa04370	0.51131	0.51131	0.51131
DB00317	Gefitinib	EGFRi	DCL000350	Vandetanib	EGFRi 3	hsa04320-hsa04370; hsa04320-hsa04915; hsa04320-hsa04012; hsa04151-hsa04370; hsa04151-hsa04912; hsa04510-hsa04915; hsa04060-hsa04370; hsa04060-hsa04012; hsa04912-hsa04370; hsa04912-hsa04915; hsa04912-hsa04012; hsa04912-hsa04020; hsa04540-hsa04370; hsa04540-hsa04066; hsa04540-hsa04915; hsa04540-hsa04012; hsa04066-hsa04370; hsa04066-hsa04915; hsa04066-hsa04012; hsa04915-hsa04370; hsa04915-hsa04010; …	0.265232	0.256375	0.510378
DB00530	Erlotinib	EGFRi	DCL000350	Vandetanib	EGFRi 3	hsa04320-hsa04370; hsa04320-hsa04915; hsa04320-hsa04012; hsa04151-hsa04370; hsa04151-hsa04912; hsa04510-hsa04915; hsa04060-hsa04370; hsa04060-hsa04012; hsa04912-hsa04370; hsa04912-hsa04915; hsa04912-hsa04012; hsa04912-hsa04020; hsa04540-hsa04370; hsa04540-hsa04066; hsa04540-hsa04915; hsa04540-hsa04012; hsa04066-hsa04370; hsa04066-hsa04915; hsa04066-hsa04012; hsa04915-hsa04370; hsa04915-hsa04010; …	0.265232	0.256375	0.510378
DNC004815	Neratinib	EGFRi 3	DB08875	Cabozantinib	MTKi 3	hsa04320-hsa04151; hsa04320-hsa04370; hsa04151-hsa04060; hsa04151-hsa04370; hsa04510-hsa04370; hsa04060-hsa04370; hsa04912-hsa04151; hsa04912-hsa04370; hsa04540-hsa04151; hsa04540- hsa04540-hsa04370; hsa04066-hsa04151; hsa04066-hsa04060; hsa04066-hsa04370; hsa04915-hsa04151; hsa04915-hsa04510; hsa04915-hsa04370; hsa04010-hsa04510; hsa04010-hsa04370; hsa04012-hsa04151; hsa04012-hsa04060; hsa04012-…	0.243939	0.256414	0.508803
DCL000350	Vandetanib	EGFRi 3	DB08875	Cabozantinib	MTKi 3	hsa04320-hsa04151; hsa04320-hsa04370; hsa04151-hsa04060; hsa04151-hsa04370; hsa04510-hsa04370; hsa04060-hsa04370; hsa04912-hsa04151; hsa04912-hsa04370; hsa04540-hsa04151; hsa04540- hsa04540-hsa04370; hsa04066-hsa04151; hsa04066-hsa04060; hsa04066-hsa04370; hsa04915-hsa04151; hsa04915-hsa04510; hsa04915-hsa04370; hsa04010-hsa04510; hsa04010-hsa04370; hsa04012-hsa04151; hsa04012-hsa04060; hsa04012-…	0.243939	0.256414	0.508803
DNC004815	Neratinib	EGFRi 3	DCL000578	Motesanib	MTKi 4	hsa04320-hsa04370; hsa04320-hsa04540; hsa04151-hsa04916; hsa04151-hsa04370; hsa04151-hsa04540; hsa04060-hsa04916; hsa04060-hsa04370; hsa04060-hsa04540; hsa04370-hsa04010; hsa04370-hsa04020; hsa04370-hsa04916; hsa04370-hsa04540; hsa04370-hsa04810; hsa04912-hsa04151; hsa04912-hsa04020; hsa04912-hsa04370; hsa04912-hsa04540; hsa04540-hsa04010; hsa04540-hsa04020; hsa04066-hsa04010; hsa04066-hsa04151; …	0.310475	0.196374	0.507323
DCL000350	Vandetanib	EGFRi 3	DCL000578	Motesanib	MTKi 4	hsa04320-hsa04370; hsa04320-hsa04540; hsa04151-hsa04916; hsa04151-hsa04370; hsa04151-hsa04540; hsa04060-hsa04916; hsa04060-hsa04370; hsa04060-hsa04540; hsa04370-hsa04010; hsa04370-hsa04020; hsa04370-hsa04916; hsa04370-hsa04540; hsa04370-hsa04810; hsa04912-hsa04151; hsa04912-hsa04020; hsa04912-hsa04370; hsa04912-hsa04540; hsa04540-hsa04010; hsa04540-hsa04020; hsa04066-hsa04010; hsa04066-hsa04151; …	0.310475	0.196374	0.507303
DCL000578	Motesanib	MTKi 4	DCL000354	Cediranib	MTKi 2	hsa04010-hsa04370; hsa04151-hsa04370; hsa04020-hsa04370; hsa04916-hsa04151; hsa04916-hsa04060; hsa04916-hsa04370; hsa04060-hsa04370; hsa04540-hsa04060; hsa04540-hsa04370; hsa04810-hsa04370	0.234393	0.258685	0.507084
DCL000578	Motesanib	MTKi 4	DCL000357	SU-14813	MTKi 2	hsa04151-hsa04916; hsa04151-hsa04060; hsa04151-hsa04370; hsa04510-hsa04370; hsa04060-hsa04916; hsa04060-hsa04370; hsa04060-hsa04540; hsa04370-hsa04010; hsa04370-hsa04020; hsa04370-hsa04916; hsa04370-hsa04540; hsa04370-hsa04810;	0.234393	0.258685	0.507084
DB06616	Bosutinib	ABL1/SRC	DB06287	Temsirolimus	mTOR	hsa04012-hsa04910; hsa04012-hsa04150; hsa04012-hsa04151; hsa04722-hsa04150; hsa04722-hsa04066	0.154706	0.34541	0.505203
DB06616	Bosutinib	ABL1/SRC	DB01590	Everolimus	mTOR	hsa04012-hsa04910; hsa04012-hsa04150; hsa04012-hsa04151; hsa04722-hsa04150; hsa04722-hsa04066	0.154706	0.34541	0.505203
DCL000350	Vandetanib	EGFRi 3	DB00072	Trastuzumab	HER2	hsa04012-hsa04320; hsa04012-hsa04151; hsa04012-hsa04060; hsa04012-hsa04370; hsa04012-hsa04912; hsa04012-hsa04540; hsa04012-hsa04066; hsa04012-hsa04915; hsa04012-hsa04010; hsa04012-hsa04020; hsa04020-hsa04912; hsa04066-hsa04151; hsa04066-hsa04060; hsa04066-hsa04370; hsa04066-hsa04540; hsa04066-hsa04915; hsa04066-hsa04010;	0.198747	0.307534	0.505009
DCL000350	Vandetanib	EGFRi 3	DCL000486	AZD8931	HER2	hsa04012-hsa04320; hsa04012-hsa04151; hsa04012-hsa04060; hsa04012-hsa04370; hsa04012-hsa04912; hsa04012-hsa04540; hsa04012-hsa04066; hsa04012-hsa04915; hsa04012-hsa04010; hsa04012-hsa04020; hsa04020-hsa04912; hsa04066-hsa04151; hsa04066-hsa04060; hsa04066-hsa04370; hsa04066-hsa04540; hsa04066-hsa04915; hsa04066-hsa04010;	0.198747	0.307534	0.505009
DCL000350	Vandetanib	EGFRi 3	DB06366	Pertuzumab	HER2	hsa04012-hsa04320; hsa04012-hsa04151; hsa04012-hsa04060; hsa04012-hsa04370; hsa04012-hsa04912; hsa04012-hsa04540; hsa04012-hsa04066; hsa04012-hsa04915; hsa04012-hsa04010; hsa04012-hsa04020; hsa04020-hsa04912; hsa04066-hsa04151; hsa04066-hsa04060; hsa04066-hsa04370; hsa04066-hsa04540; hsa04066-hsa04915; hsa04066-hsa04010;	0.198747	0.307534	0.505009
DB08875	Cabozantinib	MTKi 3	DCL000354	Cediranib	MTKi 2	hsa04151-hsa04060; hsa04151-hsa04370; hsa04510-hsa04370; hsa04060-hsa04370	0.259049	0.248747	0.504519
DB08875	Cabozantinib	MTKi 3	DCL000357	SU-14813	MTKi 2	hsa04151-hsa04060; hsa04151-hsa04370; hsa04510-hsa04370; hsa04060-hsa04370	0.259049	0.248747	0.504519
DB00317	Gefitinib	EGFRi	DCL000578	Motesanib	MTKi 4	hsa04320-hsa04370; hsa04151-hsa04916; hsa04151-hsa04370; hsa04151-hsa04540; hsa04060-hsa04916; hsa04060-hsa04370; hsa04060-hsa04540; hsa04912-hsa04151; hsa04912-hsa04370; hsa04540-hsa04010; hsa04540-hsa04020; hsa04540-hsa04370; hsa04540-hsa04810; hsa04066-hsa04151; hsa04066-hsa04370; hsa04066-hsa04540; hsa04915-hsa04010; hsa04915-hsa04151; hsa04915-hsa04020; hsa04915-hsa04916; hsa04915-hsa04370; …	0.254508	0.24972	0.504228
DB00530	Erlotinib	EGFRi	DCL000578	Motesanib	MTKi 4	hsa04320-hsa04370; hsa04151-hsa04916; hsa04151-hsa04370; hsa04151-hsa04540; hsa04060-hsa04916; hsa04060-hsa04370; hsa04060-hsa04540; hsa04912-hsa04151; hsa04912-hsa04370; hsa04540-hsa04010; hsa04540-hsa04020; hsa04540-hsa04370; hsa04540-hsa04810; hsa04066-hsa04151; hsa04066-hsa04370; hsa04066-hsa04540; hsa04915-hsa04010; hsa04915-hsa04151; hsa04915-hsa04020; hsa04915-hsa04916; hsa04915-hsa04370; …	0.254508	0.24972	0.504228
DB00014	Goserelin	SH	DCL000486	AZD8931	HER2	hsa04020-hsa04012; hsa04917-hsa04012; hsa04917-hsa04066; hsa04912-hsa04020; hsa04912-hsa04066	0.195152	0.315459	0.502127
DB00014	Goserelin	SH	DB06366	Pertuzumab	HER2	hsa04020-hsa04012; hsa04917-hsa04012; hsa04917-hsa04066; hsa04912-hsa04020; hsa04912-hsa04066	0.195152	0.315459	0.502127
DB08875	Cabozantinib	MTKi 3	DB01259	Lapatinib	EGFRi 2	hsa04151-hsa04320; hsa04151-hsa04912; hsa04151-hsa04540; hsa04151-hsa04066; hsa04151-hsa04915; hsa04151-hsa04012;-hsa04540; hsa04370-hsa04066; hsa04370-hsa04915; hsa04370-hsa04010; hsa04370-hsa04012; hsa04370-hsa04020; hsa04370-hsa04810	0.298536	0.204044	0.501672
DB08875	Cabozantinib	MTKi 3	DB08916	Afatinib	EGFRi 2	hsa04151-hsa04320; hsa04151-hsa04912; hsa04151-hsa04540; hsa04151-hsa04066; hsa04151-hsa04915; hsa04151-hsa04012;-hsa04540; hsa04370-hsa04066; hsa04370-hsa04915; hsa04370-hsa04010; hsa04370-hsa04012; hsa04370-hsa04020; hsa04370-hsa04810	0.298536	0.204044	0.501672
DB00014	Goserelin	SH	DB01259	Lapatinib	EGFRi 2	hsa04020-hsa04912; hsa04020-hsa04012; hsa04917-hsa04912; hsa04917-hsa04540; hsa04917-hsa04066; hsa04917-hsa04915; hsa04917-hsa04810; hsa04912-hsa04540; hsa04912-hsa04066; hsa04912-hsa04915; hsa04912-hsa04012; hsa04912-hsa04810; hsa04913-hsa04915;	0.199205	0.298573	0.501528
DB00014	Goserelin	SH	DB08916	Afatinib	EGFRi 2	hsa04020-hsa04912; hsa04020-hsa04012; hsa04917-hsa04912; hsa04917-hsa04540; hsa04917-hsa04066; hsa04917-hsa04915; hsa04917-hsa04810; hsa04912-hsa04540; hsa04912-hsa04066; hsa04912-hsa04915; hsa04912-hsa04012; hsa04912-hsa04810; hsa04913-hsa04915;	0.199205	0.298573	0.501528
DCL001087	BKM120	PI3K	DB01590	Everolimus	mTOR	hsa04380-hsa04012; hsa04380-hsa04066; hsa04062-hsa04910; hsa04066-hsa04910; hsa04066-hsa04150; hsa04910-hsa04150; hsa04910-hsa04012; hsa04660-hsa04150; hsa04664-hsa04150; hsa04662-hsa04066; hsa04722-hsa04150; hsa04668-hsa04066; hsa04725-hsa04012; hsa04725-hsa04066; hsa04150-hsa04920; hsa04150-hsa04151; hsa04150-hsa04012; hsa04151-hsa04920; hsa04510-hsa04150; hsa04917-hsa04066; hsa04370-hsa04910; …	0.2086	0.351133	0.501346
DCL001087	BKM120	PI3K	DB06287	Temsirolimus	mTOR	hsa04380-hsa04012; hsa04380-hsa04066; hsa04062-hsa04910; hsa04066-hsa04910; hsa04066-hsa04150; hsa04910-hsa04150; hsa04910-hsa04012; hsa04660-hsa04150; hsa04664-hsa04150; hsa04662-hsa04066; hsa04722-hsa04150; hsa04668-hsa04066; hsa04725-hsa04012; hsa04725-hsa04066; hsa04150-hsa04920; hsa04150-hsa04151; hsa04150-hsa04012; hsa04151-hsa04920; hsa04510-hsa04150; hsa04917-hsa04066; hsa04370-hsa04910; …	0.2086	0.351133	0.501346
DB08875	Cabozantinib	MTKi 3	DB06616	Bosutinib	ABL1/SRC	hsa04510-hsa04012; hsa04370-hsa04012; hsa04370-hsa04722;	0.346541	0.155385	0.501126
DB00317	Gefitinib	EGFRi	DB00014	Goserelin	SH	hsa04151-hsa04912; hsa04912-hsa04020; hsa04912-hsa04917; hsa04540-hsa04020; hsa04540-hsa04912; hsa04915-hsa04020; hsa04915-hsa04917; hsa04915-hsa04912; hsa04915-hsa04913; hsa04012-hsa04020; hsa04012-hsa04917; 0 hsa04012-hsa04912; hsa04810-hsa04917; hsa04810-hsa04912;	0.349672	0.15247	0.500198
DB08875	Cabozantinib	MTKi 3	DB00481	Raloxifene	SERM	hsa04151-hsa04915; hsa04510-hsa04915; hsa04370-hsa04917; hsa04370-hsa04915	0.297329	0.199623	0.500192
DB08875	Cabozantinib	MTKi 3	DB00947	Fulvestrant	SERM	hsa04151-hsa04915; hsa04510-hsa04915; hsa04370-hsa04917; hsa04370-hsa04915	0.297329	0.199623	0.500192
DB08875	Cabozantinib	MTKi 3	DB00675	Tamoxifen	SERM	hsa04151-hsa04915; hsa04510-hsa04915; hsa04370-hsa04917; hsa04370-hsa04915	0.297329	0.199623	0.500192
DB08875	Cabozantinib	MTKi 3	DNC007422	Arzoxifene	SERM	hsa04151-hsa04915; hsa04510-hsa04915; hsa04370-hsa04917; hsa04370-hsa04915	0.297329	0.199623	0.500192
DB08875	Cabozantinib	MTKi 3	DB00539	Toremifene	SERM	hsa04151-hsa04915; hsa04510-hsa04915; hsa04370-hsa04917; hsa04370-hsa04915	0.297329	0.199623	0.500192
DB08875	Cabozantinib	MTKi 3	DB04575	Quinestrol	SH	hsa04151-hsa04915; hsa04510-hsa04915; hsa04370-hsa04917; hsa04370-hsa04915	0.297329	0.199623	0.500192
DCL000578	Motesanib	MTKi 4	DB08875	Cabozantinib	MTKi 3	hsa04010-hsa04370; hsa04151-hsa04370; hsa04020-hsa04370; hsa04916-hsa04151; hsa04916-hsa04060; hsa04916-hsa04370; hsa04060-hsa04370; hsa04540-hsa04060; hsa04540-hsa04370; hsa04810-hsa04370	0.226145	0.274774	0.500003
DCL000486	AZD8931	HER2	DCL000578	Motesanib	MTKi 4	hsa04510-hsa04370; hsa04510-hsa04810; hsa04012-hsa04370; hsa04012-hsa04810; hsa04020-hsa04370; hsa04066-hsa04060; hsa04066-hsa04370	0.0661859	0.0155039	0.499417
DB06366	Pertuzumab	HER2	DCL000578	Motesanib	MTKi 4	hsa04510-hsa04370; hsa04510-hsa04810; hsa04012-hsa04370; hsa04012-hsa04810; hsa04020-hsa04370; hsa04066-hsa04060; hsa04066-hsa04370	0.0661859	0.0155039	0.499417
DCL000350	Vandetanib	EGFRi 3	DCL000357	SU-14813	MTKi 2	hsa04320-hsa04151; hsa04320-hsa04370; hsa04151-hsa04060; hsa04151-hsa04370; hsa04510-hsa04370; hsa04060-hsa04370; hsa04912-hsa04151; hsa04912-hsa04370; hsa04540-hsa04151; hsa04540-hsa04060; hsa04540-hsa04370; hsa04066-hsa04151; hsa04066-hsa04060; hsa04066-hsa04370; hsa04915-hsa04151; hsa04915-hsa04510; hsa04915-hsa04370; hsa04010-hsa04510; hsa04010-hsa04370; hsa04012-hsa04151; hsa04012-hsa04060; …	0.270891	0.227852	0.498935
DNC004815	Neratinib	EGFRi 3	DCL000357	SU-14813	MTKi 2	hsa04320-hsa04151; hsa04320-hsa04370; hsa04151-hsa04060; hsa04151-hsa04370; hsa04510-hsa04370; hsa04060-hsa04370; hsa04912-hsa04151; hsa04912-hsa04370; hsa04540-hsa04151; hsa04540-hsa04060; hsa04540-hsa04370; hsa04066-hsa04151; hsa04066-hsa04060; hsa04066-hsa04370; hsa04915-hsa04151; hsa04915-hsa04510; hsa04915-hsa04370; hsa04010-hsa04510; hsa04010-hsa04370; hsa04012-hsa04151; hsa04012-hsa04060; …	0.270891	0.227852	0.498935
DNC004815	Neratinib	EGFRi 3	DCL000354	Cediranib	MTKi 2	hsa04320-hsa04151; hsa04320-hsa04370; hsa04151-hsa04060; hsa04151-hsa04370; hsa04510-hsa04370; hsa04060-hsa04370; hsa04912-hsa04151; hsa04912-hsa04370; hsa04540-hsa04151; hsa04540-hsa04060; hsa04540-hsa04370; hsa04066-hsa04151; hsa04066-hsa04060; hsa04066-hsa04370; hsa04915-hsa04151; hsa04915-hsa04510; hsa04915-hsa04370; hsa04010-hsa04510; hsa04010-hsa04370; hsa04012-hsa04151; hsa04012-hsa04060; …	0.270891	0.227852	0.498935
DCL000350	Vandetanib	EGFRi 3	DCL000354	Cediranib	MTKi 2	hsa04320-hsa04151; hsa04320-hsa04370; hsa04151-hsa04060; hsa04151-hsa04370; hsa04510-hsa04370; hsa04060-hsa04370; hsa04912-hsa04151; hsa04912-hsa04370; hsa04540-hsa04151; hsa04540-hsa04060; hsa04540-hsa04370; hsa04066-hsa04151; hsa04066-hsa04060; hsa04066-hsa04370; hsa04915-hsa04151; hsa04915-hsa04510; hsa04915-hsa04370; hsa04010-hsa04510; hsa04010-hsa04370; hsa04012-hsa04151; hsa04012-hsa04060; …	0.270891	0.227852	0.498935
DCL000527	Figitumumab	IGFR1i	DB08875	Cabozantinib	MTKi 3	hsa04151-hsa04370; hsa04730-hsa04151; hsa04730-hsa04370; hsa04913-hsa04151; hsa04913-hsa04510; hsa04914-hsa04151; hsa04914-hsa04510; hsa04914-hsa04370; hsa04066-hsa04370	0.23934	0.258482	0.497823
DB06287	Temsirolimus	mTOR	DB00317	Gefitinib	EGFRi	hsa04910-hsa04066; hsa04910-hsa04915; hsa04150-hsa04066; hsa04150-hsa04012; hsa04151-hsa04320; hsa04151-hsa04912; hsa04151-hsa04012; hsa04012-hsa04320; hsa04012-hsa04060; hsa04012-hsa04912; hsa04012-hsa04066; hsa04012-hsa04915; hsa04012-hsa04010; hsa04012-hsa04020; hsa04066-hsa04915; hsa04066-hsa04810	0.244494	0.242833	0.474751
DB01590	Everolimus	mTOR	DB00317	Gefitinib	EGFRi	hsa04910-hsa04066; hsa04910-hsa04915; hsa04150-hsa04066; hsa04150-hsa04012; hsa04151-hsa04320; hsa04151-hsa04912; hsa04151-hsa04012; hsa04012-hsa04320; hsa04012-hsa04060; hsa04012-hsa04912; hsa04012-hsa04066; hsa04012-hsa04915; hsa04012-hsa04010; hsa04012-hsa04020; hsa04066-hsa04915; hsa04066-hsa04810	0.244494	0.242833	0.474751
DB06287	Temsirolimus	mTOR	DB00530	Erlotinib	EGFRi	hsa04910-hsa04066; hsa04910-hsa04915; hsa04150-hsa04066; hsa04150-hsa04012; hsa04151-hsa04320; hsa04151-hsa04912; hsa04151-hsa04012; hsa04012-hsa04320; hsa04012-hsa04060; hsa04012-hsa04912; hsa04012-hsa04066; hsa04012-hsa04915; hsa04012-hsa04010; hsa04012-hsa04020; hsa04066-hsa04915; hsa04066-hsa04810	0.244494	0.242833	0.474751
DB00072	Trastuzumab	HER2	DCL000486	AZD8931	HER2	hsa04510-hsa04012; hsa04510-hsa04520; hsa04510-hsa04066; hsa04012-hsa04020; hsa04012-hsa04066	0.251864	0.251864	0.474002
DCL000486	AZD8931	HER2	DB06366	Pertuzumab	HER2	hsa04510-hsa04012; hsa04510-hsa04520; hsa04510-hsa04066; hsa04012-hsa04020; hsa04012-hsa04066	0.251864	0.251864	0.474002
DCL000165	Midostaurin	MTKi 1	DB01229	Paclitaxel	MM	hsa04510-hsa04540; hsa04010-hsa04540	0.406964	0.0604474	0.441964
DB01259	Lapatinib	EGFRi 2	DB06287	Temsirolimus	mTOR	hsa04320-hsa04012; hsa04151-hsa04012; hsa04151-hsa04066; hsa04060-hsa04012; hsa04912-hsa04012; hsa04912-hsa04066; hsa04540-hsa04012; hsa04540-hsa04066; hsa04066-hsa04910; hsa04066-hsa04150; hsa04066-hsa04012; hsa04915-hsa04910; hsa04915-hsa04012; hsa04915-hsa04066; hsa04010-hsa04012; hsa04010-hsa04066; hsa04012-hsa04150; hsa04020-hsa04012; hsa04810-hsa04066	0.236556	0.21349	0.44365
DB08916	Afatinib	EGFRi 2	DB06287	Temsirolimus	mTOR	hsa04320-hsa04012; hsa04151-hsa04012; hsa04151-hsa04066; hsa04060-hsa04012; hsa04912-hsa04012; hsa04912-hsa04066; hsa04540-hsa04012; hsa04540-hsa04066; hsa04066-hsa04910; hsa04066-hsa04150; hsa04066-hsa04012; hsa04915-hsa04910; hsa04915-hsa04012; hsa04915-hsa04066; hsa04010-hsa04012; hsa04010-hsa04066; hsa04012-hsa04150; hsa04020-hsa04012; hsa04810-hsa04066	0.236556	0.21349	0.44365
DB08916	Afatinib	EGFRi 2	DB01590	Everolimus	mTOR	hsa04320-hsa04012; hsa04151-hsa04012; hsa04151-hsa04066; hsa04060-hsa04012; hsa04912-hsa04012; hsa04912-hsa04066; hsa04540-hsa04012; hsa04540-hsa04066; hsa04066-hsa04910; hsa04066-hsa04150; hsa04066-hsa04012; hsa04915-hsa04910; hsa04915-hsa04012; hsa04915-hsa04066; hsa04010-hsa04012; hsa04010-hsa04066; hsa04012-hsa04150; hsa04020-hsa04012; hsa04810-hsa04066	0.236556	0.21349	0.44365
DB08875	Cabozantinib	MTKi 3	DCL000242	Tanespimycin	HSPi 1	hsa04151-hsa04914; hsa04510-hsa04914; hsa04370-hsa04151; hsa04370-hsa04914; hsa04370-hsa04915; hsa04360-hsa04151	0.329991	0.116235	0.440638
DB01229	Paclitaxel	MM	DCL000486	AZD8931	HER2	hsa04151-hsa04066; hsa04540-hsa04066; hsa04066-hsa04012;	0.091111	0.339813	0.434461
DCL001206	LFA102	Prol	DCL000486	AZD8931	HER2	hsa04151-hsa04066; hsa04060-hsa04066; hsa04917-hsa04066	0	0.430147	0.430147
DCL001206	LFA102	Prol	DB06366	Pertuzumab	HER2	hsa04151-hsa04066; hsa04060-hsa04066; hsa04917-hsa04066	0	0.430147	0.430147
DCL001206	LFA102	Prol	DB00072	Trastuzumab	HER2	hsa04151-hsa04066; hsa04060-hsa04066; hsa04917-hsa04066	0	0.430147	0.430147
DNC004815	Neratinib	EGFRi 3	DB00014	Goserelin	SH	hsa04370-hsa04020; hsa04370-hsa04917; hsa04370-hsa04912; hsa04912-hsa04020; hsa04912-hsa04917; hsa04912-hsa04913; hsa04540-hsa04020; hsa04540-hsa04912; hsa04066-hsa04917; hsa04915-hsa04020; hsa04915-hsa04917; hsa04915-hsa04912; hsa04915-hsa04913; hsa04012-hsa04020; hsa04012-hsa04912; hsa04810-hsa04917; hsa04810-hsa04912	0.275944	0.152258	0.428202
DCL000527	Figitumumab	IGFR1i	DB00317	Gefitinib	EGFRi	hsa04151-hsa04320; hsa04151-hsa04912; hsa04151-hsa04540; hsa04151-hsa04066; hsa04151-hsa04915; hsa04151-hsa04012; hsa04114-hsa04915; hsa04730-hsa04151; hsa04730-hsa04912; hsa04730-hsa04066; hsa04730-hsa04915; hsa04730-hsa04810; hsa04913-hsa04151; hsa04913-hsa04066; hsa04913-hsa04915; hsa04914-hsa04151; hsa04914-hsa04066; hsa04914-hsa04915; hsa04066-hsa04540; hsa04066-hsa04915; hsa04066-hsa04012	0.170431	0.255214	0.425645
DCL000527	Figitumumab	IGFR1i	DB00530	Erlotinib	EGFRi	hsa04151-hsa04320; hsa04151-hsa04912; hsa04151-hsa04540; hsa04151-hsa04066; hsa04151-hsa04915; hsa04151-hsa04012; hsa04114-hsa04915; hsa04730-hsa04151; hsa04730-hsa04912; hsa04730-hsa04066; hsa04730-hsa04915; hsa04730-hsa04810; hsa04913-hsa04151; hsa04913-hsa04066; hsa04913-hsa04915; hsa04914-hsa04151; hsa04914-hsa04066; hsa04914-hsa04915; hsa04066-hsa04540; hsa04066-hsa04915; hsa04066-hsa04012	0.170431	0.255214	0.425645
DCL001206	LFA102	Prol	DB01259	Lapatinib	EGFRi 2	hsa04151-hsa04320; hsa04151-hsa04912; hsa04151-hsa04540; hsa04151-hsa04066; hsa04151-hsa04915; hsa04151-hsa04012; hsa04060-hsa04540; hsa04060-hsa04066; hsa04060-hsa04012; hsa04917-hsa04151; hsa04917-hsa04060; hsa04917-hsa04066; hsa04917-hsa04915; hsa04917-hsa04810; hsa04080-hsa04060; hsa04630-hsa04912	0.096626	0.328896	0.425522
DCL001206	LFA102	Prol	DB08916	Afatinib	EGFRi 2	hsa04151-hsa04320; hsa04151-hsa04912; hsa04151-hsa04540; hsa04151-hsa04066; hsa04151-hsa04915; hsa04151-hsa04012; hsa04060-hsa04540; hsa04060-hsa04066; hsa04060-hsa04012; hsa04917-hsa04151; hsa04917-hsa04060; hsa04917-hsa04066; hsa04917-hsa04915; hsa04917-hsa04810; hsa04080-hsa04060; hsa04630-hsa04912	0.096626	0.328896	0.425522
DCL000165	Midostaurin	MTKi 1	DCL000578	Motesanib	MTKi 4	hsa04060-hsa04916; hsa04060-hsa04370; hsa04060-hsa04540; 0.128907727420932 hsa04540-hsa04370; hsa04540-hsa04810; hsa04066-hsa04370; hsa04020-hsa04370; hsa04720-hsa04370; hsa04720-hsa04810; hsa04666-hsa04370; hsa04725-hsa04370; hsa04726-hsa04370; hsa04726-hsa04810; hsa04510-hsa04370; hsa04916-hsa04370; hsa04916-hsa04810; hsa04370-hsa04151; hsa04370-hsa04810; hsa04010-hsa04810; hsa04012-hsa04810; h…	0.157872	0.275963	0.423663
DB00317	Gefitinib	EGFRi	DB06616	Bosutinib	ABL1/SRC	hsa04320-hsa04012; hsa04151-hsa04012; hsa04060-hsa04012; hsa04912-hsa04012; hsa04540-hsa04012; hsa04915-hsa04012; hsa04915-hsa04722; hsa04010-hsa04012; hsa04020-hsa04012; hsa04810-hsa04012; hsa04810-hsa04722	0.312533	0.1111	0.423633
DB00530	Erlotinib	EGFRi	DB06616	Bosutinib	ABL1/SRC	hsa04320-hsa04012; hsa04151-hsa04012; hsa04060-hsa04012; hsa04912-hsa04012; hsa04540-hsa04012; hsa04915-hsa04012; hsa04915-hsa04722; hsa04010-hsa04012; hsa04020-hsa04012; hsa04810-hsa04012; hsa04810-hsa04722	0.312533	0.1111	0.423633
DB01248	Docetaxel	MM	DCL000486	AZD8931	HER2	hsa04010-hsa04510; hsa04010-hsa04012; hsa04010-hsa04066; hsa04540-hsa04066	0.0966022	0.326121	0.423157
DCL000350	Vandetanib	EGFRi 3	DB00014	Goserelin	SH	hsa04370-hsa04020; hsa04370-hsa04917; hsa04370-hsa04912; hsa04912-hsa04020; hsa04912-hsa04917; hsa04912-hsa04913; hsa04540-hsa04020; hsa04540-hsa04912; hsa04066-hsa04917; hsa04915-hsa04020; hsa04915-hsa04917; hsa04915-hsa04912; hsa04915-hsa04913; hsa04012-hsa04020; hsa04012-hsa04912; hsa04810-hsa04917; hsa04810-hsa04912	0.268476	0.152258	0.420734
DCL001206	LFA102	Prol	DB08875	Cabozantinib	MTKi 3	hsa04151-hsa04060; hsa04151-hsa04370; hsa04060-hsa04370; hsa04917-hsa04151; hsa04917-hsa04060; hsa04917-hsa04370; hsa04080-hsa04151; hsa04080-hsa04060; hsa04630-hsa04370	0.144223	0.269955	0.419703
DNC004815	Neratinib	EGFRi 3	DB06616	Bosutinib	ABL1/SRC	hsa04320-hsa04012; hsa04151-hsa04012; hsa04510-hsa04012; hsa04060-hsa04012; hsa04370-hsa04012; hsa04370-hsa04722; hsa04912-hsa04012; hsa04540-hsa04012; hsa04066-hsa04012; hsa04915-hsa04012; hsa04915-hsa04722; hsa04010-hsa04012; hsa04020-hsa04012; hsa04810-hsa04012	0.339317	0.110384	0.419701
DNC004815	Neratinib	EGFRi 3	DB01590	Everolimus	mTOR	hsa04320-hsa04012; hsa04151-hsa04920; hsa04151-hsa04150; hsa04151-hsa04012; hsa04151-hsa04066; hsa04060-hsa04012; hsa04060-hsa04066; hsa04370-hsa04910; hsa04370-hsa04151; hsa04370-hsa04012; hsa04370-hsa04066; hsa04912-hsa04910; hsa04912-hsa04151; hsa04912-hsa04012; hsa04540-hsa04012; hsa04540-hsa04066; hsa04066-hsa04910; hsa04066-hsa04150; hsa04066-hsa04012; hsa04915-hsa04910; hsa04915-hsa04151; …	0.244219	0.173005	0.417004
DB06616	Bosutinib	ABL1/SRC	DB01259	Lapatinib	EGFRi 2	hsa04012-hsa04320; hsa04012-hsa04151; hsa04012-hsa04510; hsa04012-hsa04060; hsa04012-hsa04912; hsa04012-hsa04540; hsa04012-hsa04066; hsa04012-hsa04915; hsa04012-hsa04010; hsa04012-hsa04020; hsa04012-hsa04810 hsa04722-hsa04915; hsa04722-hsa04810;	0.107904	0.308498	0.416402
DB06616	Bosutinib	ABL1/SRC	DB08916	Afatinib	EGFRi 2	hsa04012-hsa04320; hsa04012-hsa04151; hsa04012-hsa04510; hsa04012-hsa04060; hsa04012-hsa04912; hsa04012-hsa04540; hsa04012-hsa04066; hsa04012-hsa04915; hsa04012-hsa04010; hsa04012-hsa04020; hsa04012-hsa04810 hsa04722-hsa04915; hsa04722-hsa04810;	0.107904	0.308498	0.416402
DB00317	Gefitinib	EGFRi	DCL000165	Midostaurin	MTKi 1	hsa04320-hsa04540; hsa04320-hsa04012; hsa04151-hsa04066; hsa04151-hsa04012; hsa04060-hsa04012; hsa04912-hsa04540; hsa04912-hsa04911; hsa04912-hsa04020; hsa04912-hsa04725; hsa04912-hsa04012; hsa04912-hsa04730; hsa04912-hsa04270; hsa04540-hsa04066; hsa04540-hsa04012; hsa04066-hsa04012; hsa04915-hsa04970; hsa04915-hsa04971; hsa04915-hsa04972; hsa04915-hsa04540; hsa04915-hsa04066; hsa04915-hsa04911; …	0.234766	0.197837	0.415882
DB00530	Erlotinib	EGFRi	DCL000165	Midostaurin	MTKi 1	hsa04320-hsa04540; hsa04320-hsa04012; hsa04151-hsa04066; hsa04151-hsa04012; hsa04060-hsa04012; hsa04912-hsa04540; hsa04912-hsa04911; hsa04912-hsa04020; hsa04912-hsa04725; hsa04912-hsa04012; hsa04912-hsa04730; hsa04912-hsa04270; hsa04540-hsa04066; hsa04540-hsa04012; hsa04066-hsa04012; hsa04915-hsa04970; hsa04915-hsa04971; hsa04915-hsa04972; hsa04915-hsa04540; hsa04915-hsa04066; hsa04915-hsa04911; …	0.234766	0.197837	0.415882
DCL000578	Motesanib	MTKi 4	DB06287	Temsirolimus	mTOR	hsa04151-hsa04920; hsa04151-hsa04150; hsa04151-hsa04066; hsa04510-hsa04150; hsa04916-hsa04151; hsa04060-hsa04066; hsa04370-hsa04910; hsa04370-hsa04151; hsa04370-hsa04012; hsa04370-hsa04066; hsa04540-hsa04066; hsa04810-hsa04910; hsa04810-hsa04012	0.184078	0.230357	0.414435
DCL000578	Motesanib	MTKi 4	DB01590	Everolimus	mTOR	hsa04151-hsa04920; hsa04151-hsa04150; hsa04151-hsa04066; hsa04510-hsa04150; hsa04916-hsa04151; hsa04060-hsa04066; hsa04370-hsa04910; hsa04370-hsa04151; hsa04370-hsa04012; hsa04370-hsa04066; hsa04540-hsa04066; hsa04810-hsa04910; hsa04810-hsa04012	0.184078	0.230357	0.414435
DB00317	Gefitinib	EGFRi	DCL001206	LFA102	Prol	hsa04320-hsa04151; hsa04060-hsa04917; hsa04060-hsa04080; hsa04912-hsa04151; hsa04912-hsa04917; hsa04912-hsa04630; hsa04540-hsa04151; hsa04540-hsa04060; hsa04066-hsa04151; hsa04066-hsa04060; hsa04915-hsa04151; hsa04915-hsa04917; hsa04915-hsa04630; hsa04012-hsa04151; hsa04012-hsa04060; hsa04810-hsa04917	0.258751	0.156532	0.413517
DB00530	Erlotinib	EGFRi	DCL001206	LFA102	Prol	hsa04320-hsa04151; hsa04060-hsa04917; hsa04060-hsa04080; hsa04912-hsa04151; hsa04912-hsa04917; hsa04912-hsa04630; hsa04540-hsa04151; hsa04540-hsa04060; hsa04066-hsa04151; hsa04066-hsa04060; hsa04915-hsa04151; hsa04915-hsa04917; hsa04915-hsa04630; hsa04012-hsa04151; hsa04012-hsa04060; hsa04810-hsa04917	0.258751	0.156532	0.413517
DB01229	Paclitaxel	MM	DNC007422	Arzoxifene	SERM	hsa04725-hsa04915; hsa04010-hsa04915; hsa04151-hsa04915; hsa04722-hsa04915; hsa04540-hsa04915; hsa04066-hsa04915	0.0711317	0.352805	0.413399
DB01229	Paclitaxel	MM	DB00481	Raloxifene	SERM	hsa04725-hsa04915; hsa04010-hsa04915; hsa04151-hsa04915; hsa04722-hsa04915; hsa04540-hsa04915; hsa04066-hsa04915	0.0711317	0.352805	0.413399
DNC004815	Neratinib	EGFRi 3	DCL000165	Midostaurin	MTKi 1	hsa04320-hsa04540; hsa04320-hsa04012; hsa04151-hsa04066; hsa04151-hsa04370; hsa04151-hsa04012; hsa04060-hsa04066; hsa04060-hsa04370; hsa04060-hsa04012 hsa04370-hsa04540; hsa04370-hsa04066; hsa04370-hsa04020; hsa04370-hsa04720; hsa04370-hsa04666; hsa04370-hsa04725; hsa04370-hsa04726; hsa04370-hsa04916; hsa04370-hsa04010; hsa04370-hsa04012; hsa04370-hsa04650; hsa04370-hsa04730; hsa04370-hsa04270; h…	0.13593	0.277284	0.413241
DNC004815	Neratinib	EGFRi 3	DCL000242	Tanespimycin	HSPi 1	hsa04320-hsa04914; hsa04320-hsa04915; hsa04151-hsa04914; hsa04370-hsa04151; hsa04370-hsa04914; hsa04370-hsa04915; hsa04912-hsa04151; hsa04912-hsa04914; hsa04912-hsa04915; hsa04540-hsa04914; hsa04540-hsa04915; hsa04066-hsa04151; hsa04066-hsa04914; hsa04066-hsa04915; hsa04915-hsa04914; hsa04010-hsa04914; hsa04010-hsa04915; hsa04012-hsa04151; hsa04012-hsa04914; hsa04012-hsa04915; hsa04810-hsa04914; …	0.219938	0.192718	0.412601
DB01229	Paclitaxel	MM	DB00014	Goserelin	SH	hsa04010-hsa04917; hsa04151-hsa04917	0.0920336	0.339627	0.41244
DCL000527	Figitumumab	IGFR1i	DCL000357	SU-14813	MTKi 2	hsa04151-hsa04370; hsa04510-hsa04370; hsa04730-hsa04151; hsa04730-hsa04370; hsa04913-hsa04151; hsa04914-hsa04151; hsa04914-hsa04370; hsa04066-hsa04151; hsa04066-hsa04370	0.230189	0.181541	0.41173
DCL000527	Figitumumab	IGFR1i	DCL000354	Cediranib	MTKi 2	hsa04151-hsa04370; hsa04510-hsa04370; hsa04730-hsa04151; hsa04730-hsa04370; hsa04913-hsa04151; hsa04914-hsa04151; hsa04914-hsa04370; hsa04066-hsa04151; hsa04066-hsa04370	0.230189	0.181541	0.41173
DCL000527	Figitumumab	IGFR1i	DCL000578	Motesanib	MTKi 4	hsa04151-hsa04916; hsa04151-hsa04370; hsa04730-hsa04151; hsa04730-hsa04370; hsa04730-hsa04810; hsa04913-hsa04151; hsa04914-hsa04151; hsa04914-hsa04370; hsa04066-hsa04370	0.260176	0.158818	0.411572
DNC007422	Arzoxifene	SERM	DB00014	Goserelin	SH	hsa04917-hsa04080; hsa04917-hsa04913; hsa04915-hsa04020; hsa04915-hsa04917; hsa04915-hsa04912; hsa04915-hsa04913	0.188485	0.244968	0.411058
DCL000350	Vandetanib	EGFRi 3	DB06287	Temsirolimus	mTOR	hsa04320-hsa04012; hsa04151-hsa04920; hsa04151-hsa04150; hsa04151-hsa04012; hsa04151-hsa04066; hsa04060-hsa04012; hsa04060-hsa04066; hsa04370-hsa04910; hsa04370-hsa04151; hsa04370-hsa04012; hsa04370-hsa04066; hsa04912-hsa04910; hsa04912-hsa04151; hsa04912-hsa04012; hsa04540-hsa04012; hsa04540-hsa04066; hsa04066-hsa04910; hsa04066-hsa04150; hsa04066-hsa04012; hsa04915-hsa04910; hsa04915-hsa04151; …	0.237326	0.173005	0.410317
DCL000350	Vandetanib	EGFRi 3	DB01590	Everolimus	mTOR	hsa04320-hsa04012; hsa04151-hsa04920; hsa04151-hsa04150; hsa04151-hsa04012; hsa04151-hsa04066; hsa04060-hsa04012; hsa04060-hsa04066; hsa04370-hsa04910; hsa04370-hsa04151; hsa04370-hsa04012; hsa04370-hsa04066; hsa04912-hsa04910; hsa04912-hsa04151; hsa04912-hsa04012; hsa04540-hsa04012; hsa04540-hsa04066; hsa04066-hsa04910; hsa04066-hsa04150; hsa04066-hsa04012; hsa04915-hsa04910; hsa04915-hsa04151; …	0.237326	0.173005	0.410317
DCL000350	Vandetanib	EGFRi 3	DCL000242	Tanespimycin	HSPi 1	hsa04320-hsa04914; hsa04320-hsa04915; hsa04151-hsa04914; hsa04370-hsa04151; hsa04370-hsa04914; hsa04370-hsa04915; hsa04912-hsa04151; hsa04912-hsa04914; hsa04912-hsa04915; hsa04540-hsa04914; hsa04540-hsa04915; hsa04066-hsa04151; hsa04066-hsa04914; hsa04066-hsa04915; hsa04915-hsa04914; hsa04010-hsa04914; hsa04010-hsa04915; hsa04012-hsa04151; hsa04012-hsa04914; hsa04012-hsa04915; hsa04810-hsa04914; …	0.217205	0.192718	0.409982
DB06616	Bosutinib	ABL1/SRC	DCL000357	SU-14813	MTKi 2	hsa04510-hsa04012; hsa04060-hsa04012; hsa04370-hsa04012; hsa04370-hsa04722	0.17259	0.235875	0.40992
DB06616	Bosutinib	ABL1/SRC	DCL000354	Cediranib	MTKi 2	hsa04510-hsa04012; hsa04060-hsa04012; hsa04370-hsa04012; hsa04370-hsa04722	0.17259	0.235875	0.40992
DCL000165	Midostaurin	MTKi 1	DB01259	Lapatinib	EGFRi 2	hsa04970-hsa04915; hsa04060-hsa04066; hsa04060-hsa04012; hsa04971-hsa04915; hsa04972-hsa04915; hsa04540-hsa04320; hsa04540-hsa04912; hsa04540-hsa04066; hsa04540-hsa04915; hsa04540-hsa04012; hsa04066-hsa04151; hsa04066-hsa04915; hsa04066-hsa04010; hsa04066-hsa04012; hsa04911-hsa04912; hhsa04911-hsa04915; hsa04020-hsa04912; hsa04020-hsa04012; hsa04720-hsa04915; hsa04666-hsa04915; hsa04725-hsa04912;…	0.00567264	0.40868	0.40868
DCL000165	Midostaurin	MTKi 1	DB08916	Afatinib	EGFRi 2	hsa04970-hsa04915; hsa04060-hsa04066; hsa04060-hsa04012; hsa04971-hsa04915; hsa04972-hsa04915; hsa04540-hsa04320; hsa04540-hsa04912; hsa04540-hsa04066; hsa04540-hsa04915; hsa04540-hsa04012; hsa04066-hsa04151; hsa04066-hsa04915; hsa04066-hsa04010; hsa04066-hsa04012; hsa04911-hsa04912; hhsa04911-hsa04915; hsa04020-hsa04912; hsa04020-hsa04012; hsa04720-hsa04915; hsa04666-hsa04915; hsa04725-hsa04912;…	0.00567264	0.40868	0.40868
DCL000578	Motesanib	MTKi 4	DCL000242	Tanespimycin	HSPi 1	hsa04010-hsa04914; hsa04151-hsa04914; hsa04916-hsa04151; hsa04916-hsa04914; hsa04370-hsa04151; hsa04370-hsa04914; hsa04370-hsa04915; hsa04540-hsa04914; hsa04810-hsa04914; hsa04810-hsa04915	0.265618	0.135314	0.408081
DB00947	Fulvestrant	SERM	DB01248	Docetaxel	MM	hsa04917-hsa04540; hsa04915-hsa04540	0.346237	0.0915665	0.407803
DB01248	Docetaxel	MM	DB00539	Toremifene	SERM	hsa04917-hsa04540; hsa04915-hsa04540	0.0915665	0.346237	0.407803
DB01248	Docetaxel	MM	DNC007422	Arzoxifene	SERM	hsa04010-hsa04917; hsa04010-hsa04915; hsa04540-hsa04915	0.0915665	0.36784	0.407803
DB01248	Docetaxel	MM	DB00481	Raloxifene	SERM	hsa04010-hsa04917; hsa04010-hsa04915; hsa04540-hsa04915	0.0915665	0.36784	0.407803
DB01248	Docetaxel	MM	DB04575	Quinestrol	SH	hsa04010-hsa04917; hsa04010-hsa04915; hsa04540-hsa04915	0.0915665	0.346237	0.407803
DCL000527	Figitumumab	IGFR1i	DB01259	Lapatinib	EGFRi 2	hsa04151-hsa04320; hsa04151-hsa04510; hsa04151-hsa04912; hsa04151-hsa04066; hsa04151-hsa04915; hsa04510-hsa04915; hsa04114-hsa04915; hsa04730-hsa04151; hsa04730-hsa04912; hsa04730-hsa04066; hsa04730-hsa04915; hsa04913-hsa04151; hsa04913-hsa04066; hsa04913-hsa04915; hsa04914-hsa04151; hsa04914-hsa04066; hsa04914-hsa04915; hsa04066-hsa04060; hsa04066-hsa04540; hsa04066-hsa04915; hsa04066-hsa04010; …	0.178431	0.228937	0.407368
DCL000527	Figitumumab	IGFR1i	DB08916	Afatinib	EGFRi 2	hsa04151-hsa04320; hsa04151-hsa04510; hsa04151-hsa04912; hsa04151-hsa04066; hsa04151-hsa04915; hsa04510-hsa04915; hsa04114-hsa04915; hsa04730-hsa04151; hsa04730-hsa04912; hsa04730-hsa04066; hsa04730-hsa04915; hsa04913-hsa04151; hsa04913-hsa04066; hsa04913-hsa04915; hsa04914-hsa04151; hsa04914-hsa04066; hsa04914-hsa04915; hsa04066-hsa04060; hsa04066-hsa04540; hsa04066-hsa04915; hsa04066-hsa04010; …	0.178431	0.228937	0.407368
DCL000357	SU-14813	MTKi 2	DB01259	Lapatinib	EGFRi 2	hsa04151-hsa04320; hsa04151-hsa04912; hsa04151-hsa04066; hsa04151-hsa04915; hsa04060-hsa04540; hsa04060-hsa04066; hsa04060-hsa04012; hsa04370-hsa04320; hsa04370-hsa04151; hsa04370-hsa04060; hsa04370-hsa04912; hsa04370-hsa04540; hsa04370-hsa04066; hsa04370-hsa04915; hsa04370-hsa04010; hsa04370-hsa04012; hsa04370-hsa04020; hsa04370-hsa04810	0.220534	0.193067	0.407367
DCL000357	SU-14813	MTKi 2	DB08916	Afatinib	EGFRi 2	hsa04151-hsa04320; hsa04151-hsa04912; hsa04151-hsa04066; hsa04151-hsa04915; hsa04060-hsa04540; hsa04060-hsa04066; hsa04060-hsa04012; hsa04370-hsa04320; hsa04370-hsa04151; hsa04370-hsa04060; hsa04370-hsa04912; hsa04370-hsa04540; hsa04370-hsa04066; hsa04370-hsa04915; hsa04370-hsa04010; hsa04370-hsa04012; hsa04370-hsa04020; hsa04370-hsa04810	0.220534	0.193067	0.407367
DCL000354	Cediranib	MTKi 2	DB01259	Lapatinib	EGFRi 2	hsa04151-hsa04320; hsa04151-hsa04912; hsa04151-hsa04066; hsa04151-hsa04915; hsa04060-hsa04540; hsa04060-hsa04066; hsa04060-hsa04012; hsa04370-hsa04320; hsa04370-hsa04151; hsa04370-hsa04060; hsa04370-hsa04912; hsa04370-hsa04540; hsa04370-hsa04066; hsa04370-hsa04915; hsa04370-hsa04010; hsa04370-hsa04012; hsa04370-hsa04020; hsa04370-hsa04810	0.220534	0.193067	0.407367
DCL000354	Cediranib	MTKi 2	DB08916	Afatinib	EGFRi 2	hsa04151-hsa04320; hsa04151-hsa04912; hsa04151-hsa04066; hsa04151-hsa04915; hsa04060-hsa04540; hsa04060-hsa04066; hsa04060-hsa04012; hsa04370-hsa04320; hsa04370-hsa04151; hsa04370-hsa04060; hsa04370-hsa04912; hsa04370-hsa04540; hsa04370-hsa04066; hsa04370-hsa04915; hsa04370-hsa04010; hsa04370-hsa04012; hsa04370-hsa04020; hsa04370-hsa04810	0.220534	0.193067	0.407367
DCL000165	Midostaurin	MTKi 1	DB03010	Epothilon	MM	hsa04510-hsa04540; hsa04010-hsa04540	0.406964	0.0192893	0.406964
DCL000165	Midostaurin	MTKi 1	DB00361	Vinorelbine	MM	hsa04510-hsa04540; hsa04010-hsa04540	0.406964	0.0192893	0.406964
DCL000165	Midostaurin	MTKi 1	DB04845	Ixabepilone	MM	hsa04510-hsa04540; hsa04010-hsa04540	0.406964	0.0192893	0.406964
DCL000165	Midostaurin	MTKi 1	DB08871	Eribulin	MM	hsa04510-hsa04540; hsa04010-hsa04540	0.406964	0.0192893	0.406964
DCL000357	SU-14813	MTKi 2	DB06287	Temsirolimus	mTOR	hsa04151-hsa04920; hsa04151-hsa04150; hsa04060-hsa04920; hsa04060-hsa04066; hsa04370-hsa04910; hsa04370-hsa04151; hsa04370-hsa04012; hsa04370-hsa04066;	0.248967	0.152357	0.406703
DCL000357	SU-14813	MTKi 2	DB01590	Everolimus	mTOR	hsa04151-hsa04920; hsa04151-hsa04150; hsa04060-hsa04920; hsa04060-hsa04066; hsa04370-hsa04910; hsa04370-hsa04151; hsa04370-hsa04012; hsa04370-hsa04066;	0.248967	0.152357	0.406703
DCL000354	Cediranib	MTKi 2	DB01590	Everolimus	mTOR	hsa04151-hsa04920; hsa04151-hsa04150; hsa04060-hsa04920; hsa04060-hsa04066; hsa04370-hsa04910; hsa04370-hsa04151; hsa04370-hsa04012; hsa04370-hsa04066;	0.248967	0.152357	0.406703
DCL000354	Cediranib	MTKi 2	DB06287	Temsirolimus	mTOR	hsa04151-hsa04920; hsa04151-hsa04150; hsa04060-hsa04920; hsa04060-hsa04066; hsa04370-hsa04910; hsa04370-hsa04151; hsa04370-hsa04012; hsa04370-hsa04066;	0.248967	0.152357	0.406703
DNC004815	Neratinib	EGFRi 3	DCL001206	LFA102	Prol	hsa04320-hsa04151; hsa04151-hsa04060; hsa04151-hsa04917; hsa04060-hsa04917; hsa04060-hsa04080; hsa04370-hsa04060; hsa04370-hsa04917; hsa04370-hsa04630; hsa04912-hsa04151; hsa04912-hsa04917; hsa04912-hsa04630; hsa04540-hsa04151; hsa04540-hsa04060; hsa04066-hsa04151; hsa04066-hsa04060; hsa04066-hsa04917; hsa04915-hsa04151; hsa04915-hsa04917; hsa04915-hsa04630; hsa04012-hsa04151; hsa04012-hsa04060; …	0.287941	0.1421	0.405759
DB00072	Trastuzumab	HER2	DCL000110	Exherin	N-Cad	hsa04510-hsa04514; hsa04520-hsa04514	0.405455	0	0.405455
DCL000486	AZD8931	HER2	DCL000110	Exherin	N-Cad	hsa04510-hsa04514; hsa04520-hsa04514	0.405455	0	0.405455
DB06366	Pertuzumab	HER2	DCL000110	Exherin	N-Cad	hsa04510-hsa04514; hsa04520-hsa04514	0.405455	0	0.405455
DCL001206	LFA102	Prol	DCL000578	Motesanib	MTKi 4	hsa04151-hsa04916; hsa04151-hsa04060; hsa04151-hsa04370; hsa04060-hsa04916; hsa04060-hsa04370; hsa04917-hsa04060; hsa04917-hsa04370; hsa04917-hsa04810; hsa04080-hsa04151; hsa04080-hsa04060; hsa04630-hsa04370;	0.163278	0.246984	0.405265
DCL000165	Midostaurin	MTKi 1	DB08875	Cabozantinib	MTKi 3	hsa04060-hsa04370; hsa04540-hsa04370; hsa04066-hsa04370; hsa04020-hsa04370; hsa04720-hsa04370; hsa04666-hsa04370; hsa04725-hsa04370; hsa04726-hsa04370; hsa04510-hsa04370; hsa04916-hsa04370; hsa04370-hsa04151; hsa04010-hsa04370; hsa04012-hsa04370; hsa04650-hsa04370; hsa04730-hsa04370; hsa04270-hsa04370	0.139024	0.295136	0.405176
DCL000578	Motesanib	MTKi 4	DB03010	Epothilon	MM	hsa04010-hsa04540; hsa04151-hsa04010; hsa04151-hsa04540; hsa04916-hsa04540	0.29832	0.112154	0.404718
DCL000578	Motesanib	MTKi 4	DB00361	Vinorelbine	MM	hsa04010-hsa04540; hsa04151-hsa04010; hsa04151-hsa04540; hsa04916-hsa04540	0.29832	0.112154	0.404718
DCL000578	Motesanib	MTKi 4	DB08871	Eribulin	MM	hsa04010-hsa04540; hsa04151-hsa04010; hsa04151-hsa04540; hsa04916-hsa04540	0.29832	0.112154	0.404718
DB08875	Cabozantinib	MTKi 3	DB00351	Megestrol	SH	hsa04114-hsa04370; hsa04914-hsa04370	0.403688	0.0181818	0.403688
DCL000527	Figitumumab	IGFR1i	DB00014	Goserelin	SH	hsa04151-hsa04913; hsa04510-hsa04913; hsa04114-hsa04913; hsa04730-hsa04913; hsa04913-hsa04917; hsa04913-hsa04080; hsa04913-hsa04912; hsa04914-hsa04912; hsa04914-hsa04913; hsa04066-hsa04913	0.286398	0.118653	0.402427
DCL000350	Vandetanib	EGFRi 3	DB06616	Bosutinib	ABL1/SRC	hsa04320-hsa04012; hsa04151-hsa04012; hsa04060-hsa04012; hsa04370-hsa04012; hsa04370-hsa04722; hsa04912-hsa04012; hsa04540-hsa04012; hsa04066-hsa04012; hsa04915-hsa04012; hsa04915-hsa04722; hsa04010-hsa04012; hsa04020-hsa04012; hsa04810-hsa04012; hsa04810-hsa04722	0.323963	0.100213	0.402418
DCL000350	Vandetanib	EGFRi 3	DCL000165	Midostaurin	MTKi 1	hsa04320-hsa04540; hsa04320-hsa04012; hsa04151-hsa04066; hsa04151-hsa04370; hsa04151-hsa04012; hsa04060-hsa04066; hsa04060-hsa04370; hsa04060-hsa04012 hsa04370-hsa04540; hsa04370-hsa04066; hsa04370-hsa04020; hsa04370-hsa04720; hsa04370-hsa04666; hsa04370-hsa04725; hsa04370-hsa04726; hsa04370-hsa04916; hsa04370-hsa04010; hsa04370-hsa04012; hsa04370-hsa04650; hsa04370-hsa04730; hsa04370-hsa04270; h…	0.12504	0.277284	0.402323
DB03010	Epothilon	MM	DCL000486	AZD8931	HER2	hsa04540-hsa04510; hsa04540-hsa04066;	0.0887823	0.313535	0.402234
DB03010	Epothilon	MM	DB06366	Pertuzumab	HER2	hsa04540-hsa04510; hsa04540-hsa04066;	0.0887823	0.313535	0.402234
DB00361	Vinorelbine	MM	DCL000486	AZD8931	HER2	hsa04540-hsa04510; hsa04540-hsa04066;	0.0887823	0.313535	0.402234
DB04845	Ixabepilone	MM	DCL000486	AZD8931	HER2	hsa04540-hsa04510; hsa04540-hsa04066;	0.0887823	0.313535	0.402234
DB04845	Ixabepilone	MM	DB06366	Pertuzumab	HER2	hsa04540-hsa04510; hsa04540-hsa04066;	0.0887823	0.313535	0.402234
DB08871	Eribulin	MM	DB06366	Pertuzumab	HER2	hsa04540-hsa04510; hsa04540-hsa04066;	0.0887823	0.313535	0.402234
DCL000486	AZD8931	HER2	DB08871	Eribulin	MM	hsa04510-hsa04540; hsa04066-hsa04540	0.0796343	0.323535	0.401978
DB08875	Cabozantinib	MTKi 3	DB00014	Goserelin	SH	hsa04151-hsa04917; hsa04370-hsa04020; hsa04370-hsa04917; hsa04370-hsa04912	0.401898	0.00391358	0.401898
DB00014	Goserelin	SH	DB08871	Eribulin	MM	hsa04917-hsa04540; hsa04915-hsa04540	0.369627	0.0573562	0.40173
DB03010	Epothilon	MM	DB00014	Goserelin	SH	hsa04540-hsa04912	0.0573562	0.369627	0.40173
DB00361	Vinorelbine	MM	DB00014	Goserelin	SH	hsa04540-hsa04912	0.0573562	0.369627	0.40173
DB04845	Ixabepilone	MM	DB00014	Goserelin	SH	hsa04540-hsa04912	0.0573562	0.369627	0.40173
DCL000242	Tanespimycin	HSPi 1	DB01259	Lapatinib	EGFRi 2	hsa04621-hsa04010; hsa04151-hsa04320; hsa04151-hsa04912; hsa04151-hsa04540; hsa04151-hsa04066; hsa04151-hsa04915; hsa04151-hsa04012; hsa04914-hsa04320; hsa04914-hsa04151; hsa04914-hsa04912; hsa04914-hsa04540; hsa04914-hsa04066; hsa04914-hsa04915; hsa04914-hsa04010; hsa04914-hsa04012; hsa04914-hsa04810; hsa04915-hsa04320; hsa04915-hsa04912; hsa04915-hsa04540; hsa04915-hsa04066; hsa04915-hsa04010; …	0.189007	0.211561	0.401009
DCL000242	Tanespimycin	HSPi 1	DB08916	Afatinib	EGFRi 2	hsa04621-hsa04010; hsa04151-hsa04320; hsa04151-hsa04912; hsa04151-hsa04540; hsa04151-hsa04066; hsa04151-hsa04915; hsa04151-hsa04012; hsa04914-hsa04320; hsa04914-hsa04151; hsa04914-hsa04912; hsa04914-hsa04540; hsa04914-hsa04066; hsa04914-hsa04915; hsa04914-hsa04010; hsa04914-hsa04012; hsa04914-hsa04810; hsa04915-hsa04320; hsa04915-hsa04912; hsa04915-hsa04540; hsa04915-hsa04066; hsa04915-hsa04010; …	0.189007	0.211561	0.401009
DB00072	Trastuzumab	HER2	DB06287	Temsirolimus	mTOR	hsa04510-hsa04910; hsa04510-hsa04150; hsa04012-hsa04150; hsa04012-hsa04066; hsa04020-hsa04012; hsa04066-hsa04910; hsa04066-hsa04150; hsa04066-hsa04151	0.189845	0.216221	0.400846
DB00072	Trastuzumab	HER2	DB01590	Everolimus	mTOR	hsa04510-hsa04910; hsa04510-hsa04150; hsa04012-hsa04150; hsa04012-hsa04066; hsa04020-hsa04012; hsa04066-hsa04910; hsa04066-hsa04150; hsa04066-hsa04151	0.189845	0.216221	0.400846
DCL000486	AZD8931	HER2	DB06287	Temsirolimus	mTOR	hsa04510-hsa04910; hsa04510-hsa04150; hsa04012-hsa04150; hsa04012-hsa04066; hsa04020-hsa04012; hsa04066-hsa04910; hsa04066-hsa04150; hsa04066-hsa04151	0.189845	0.216221	0.400846
DB06366	Pertuzumab	HER2	DB06287	Temsirolimus	mTOR	hsa04510-hsa04910; hsa04510-hsa04150; hsa04012-hsa04150; hsa04012-hsa04066; hsa04020-hsa04012; hsa04066-hsa04910; hsa04066-hsa04150; hsa04066-hsa04151	0.189845	0.216221	0.400846
DCL000486	AZD8931	HER2	DB01590	Everolimus	mTOR	hsa04510-hsa04910; hsa04510-hsa04150; hsa04012-hsa04150; hsa04012-hsa04066; hsa04020-hsa04012; hsa04066-hsa04910; hsa04066-hsa04150; hsa04066-hsa04151	0.189845	0.216221	0.400846
DB06366	Pertuzumab	HER2	DB01590	Everolimus	mTOR	hsa04510-hsa04910; hsa04510-hsa04150; hsa04012-hsa04150; hsa04012-hsa04066; hsa04020-hsa04012; hsa04066-hsa04910; hsa04066-hsa04150; hsa04066-hsa04151	0.189845	0.216221	0.400846
DCL001085	BEZ235	mTOR/PI3K	DCL000110	Exherin	N-Cad	hsa04510-hsa04514	0.400678	0.00191921	0.400678
DCL001086	BGT226	mTOR/PI3K	DCL000110	Exherin	N-Cad	hsa04510-hsa04514	0.400678	0.00191921	0.400678
DCL000165	Midostaurin	MTKi 1	DB01248	Docetaxel	MM	hsa04510-hsa04540; hsa04010-hsa04540	0.400536	0.0593137	0.400536
DCL000350	Vandetanib	EGFRi 3	DCL001206	LFA102	Prol	hsa04320-hsa04151; hsa04151-hsa04060; hsa04151-hsa04917; hsa04060-hsa04917; hsa04060-hsa04080; hsa04370-hsa04060; hsa04370-hsa04917; hsa04370-hsa04630; hsa04912-hsa04151; hsa04912-hsa04917; hsa04912-hsa04630; hsa04540-hsa04151; hsa04540-hsa04060; hsa04066-hsa04151; hsa04066-hsa04060; hsa04066-hsa04917; hsa04915-hsa04151; hsa04915-hsa04917; hsa04915-hsa04630; hsa04012-hsa04151; hsa04012-hsa04060; …	0.274197	0.1421	0.400025
DCL000527	Figitumumab	IGFR1i	DB06287	Temsirolimus	mTOR	hsa04151-hsa04920; hsa04151-hsa04150; hsa04151-hsa04066; hsa04510-hsa04150;hsa04730-hsa04151; hsa04730-hsa04066; hsa04913-hsa04910; hsa04913-hsa04151; hsa04913-hsa04066; hsa04914-hsa04910; hsa04914-hsa04151; hsa04914-hsa04066; hsa04066-hsa04910; hsa04066-hsa04150	0.194703	0.219932	0.39998
DCL000527	Figitumumab	IGFR1i	DB01590	Everolimus	mTOR	hsa04151-hsa04920; hsa04151-hsa04150; hsa04151-hsa04066; hsa04510-hsa04150;hsa04730-hsa04151; hsa04730-hsa04066; hsa04913-hsa04910; hsa04913-hsa04151; hsa04913-hsa04066; hsa04914-hsa04910; hsa04914-hsa04151; hsa04914-hsa04066; hsa04066-hsa04910; hsa04066-hsa04150	0.194703	0.219932	0.39998
DB08875	Cabozantinib	MTKi 3	DB06287	Temsirolimus	mTOR	hsa04151-hsa04920; hsa04151-hsa04150; hsa04151-hsa04066; hsa04510-hsa04150; hsa04060-hsa04066; hsa04370-hsa04910; hsa04370-hsa04151; hsa04370-hsa04012; hsa04370-hsa04066	0.197404	0.199865	0.399727
DB08875	Cabozantinib	MTKi 3	DB01590	Everolimus	mTOR	hsa04151-hsa04920; hsa04151-hsa04150; hsa04151-hsa04066; hsa04510-hsa04150; hsa04060-hsa04066; hsa04370-hsa04910; hsa04370-hsa04151; hsa04370-hsa04012; hsa04370-hsa04066	0.197404	0.199865	0.399727
DCL001087	BKM120	PI3K	DCL000110	Exherin	N-Cad	hsa04510-hsa04514	0.399068	0.00191921	0.399068
DCL000357	SU-14813	MTKi 2	DB00317	Gefitinib	EGFRi	hsa04151-hsa04320; hsa04151-hsa04912; hsa04151-hsa04066; hsa04151-hsa04915; hsa04151-hsa04012; hsa04060-hsa04012; hsa04370-hsa04320; hsa04370-hsa04151; hsa04370-hsa04510; 0.0820733419616706 hsa04370-hsa04060; hsa04370-hsa04912; hsa04370-hsa04540; hsa04370-hsa04066; hsa04370-hsa04915; hsa04370-hsa04010; hsa04370-hsa04012; hsa04370-hsa04020; hsa04370-hsa04810	0.199534	0.196219	0.398735
DCL000357	SU-14813	MTKi 2	DB00530	Erlotinib	EGFRi	hsa04151-hsa04320; hsa04151-hsa04912; hsa04151-hsa04066; hsa04151-hsa04915; hsa04151-hsa04012; hsa04060-hsa04012; hsa04370-hsa04320; hsa04370-hsa04151; hsa04370-hsa04510; 0.0820733419616706 hsa04370-hsa04060; hsa04370-hsa04912; hsa04370-hsa04540; hsa04370-hsa04066; hsa04370-hsa04915; hsa04370-hsa04010; hsa04370-hsa04012; hsa04370-hsa04020; hsa04370-hsa04810	0.199534	0.196219	0.398735
DB00317	Gefitinib	EGFRi	DCL000354	Cediranib	MTKi 2	hsa04151-hsa04320; hsa04151-hsa04912; hsa04151-hsa04066; hsa04151-hsa04915; hsa04151-hsa04012; hsa04060-hsa04012; hsa04370-hsa04320; hsa04370-hsa04151; hsa04370-hsa04510; 0.0820733419616706 hsa04370-hsa04060; hsa04370-hsa04912; hsa04370-hsa04540; hsa04370-hsa04066; hsa04370-hsa04915; hsa04370-hsa04010; hsa04370-hsa04012; hsa04370-hsa04020; hsa04370-hsa04810	0.199534	0.196219	0.398735
DB00530	Erlotinib	EGFRi	DCL000354	Cediranib	MTKi 2	hsa04151-hsa04320; hsa04151-hsa04912; hsa04151-hsa04066; hsa04151-hsa04915; hsa04151-hsa04012; hsa04060-hsa04012; hsa04370-hsa04320; hsa04370-hsa04151; hsa04370-hsa04510; 0.0820733419616706 hsa04370-hsa04060; hsa04370-hsa04912; hsa04370-hsa04540; hsa04370-hsa04066; hsa04370-hsa04915; hsa04370-hsa04010; hsa04370-hsa04012; hsa04370-hsa04020; hsa04370-hsa04810	0.199534	0.196219	0.398735
DB06616	Bosutinib	ABL1/SRC	DNC007422	Arzoxifene	SERM	hsa04012-hsa04915; hsa04722-hsa04915	0.145193	0.252359	0.398471
DB06616	Bosutinib	ABL1/SRC	DB00481	Raloxifene	SERM	hsa04012-hsa04915; hsa04722-hsa04915	0.145193	0.252359	0.398471
DB06616	Bosutinib	ABL1/SRC	DB00675	Tamoxifen	SERM	hsa04012-hsa04915; hsa04722-hsa04915	0.145193	0.252359	0.398471
DB00947	Fulvestrant	SERM	DB01229	Paclitaxel	MM	hsa04010-hsa04915; hsa04540-hsa04915; hsa04066-hsa04915	0.318247	0.0911317	0.397984
DB00675	Tamoxifen	SERM	DB04845	Ixabepilone	MM	hsa04917-hsa04540; hsa04915-hsa04540	0.340627	0.0573562	0.397984
DB03010	Epothilon	MM	DB00675	Tamoxifen	SERM	hsa04540-hsa04917; hsa04540-hsa04915	0.0573562	0.340627	0.397984
DB03010	Epothilon	MM	DNC007422	Arzoxifene	SERM	hsa04540-hsa04917; hsa04540-hsa04915	0.0573562	0.340627	0.397984
DB03010	Epothilon	MM	DB00481	Raloxifene	SERM	hsa04540-hsa04917; hsa04540-hsa04915	0.0573562	0.340627	0.397984
DB00361	Vinorelbine	MM	DNC007422	Arzoxifene	SERM	hsa04540-hsa04917; hsa04540-hsa04915	0.0573562	0.340627	0.397984
DB00361	Vinorelbine	MM	DB00481	Raloxifene	SERM	hsa04540-hsa04917; hsa04540-hsa04915	0.0573562	0.340627	0.397984
DB00361	Vinorelbine	MM	DB00675	Tamoxifen	SERM	hsa04540-hsa04917; hsa04540-hsa04915	0.0573562	0.340627	0.397984
DB04845	Ixabepilone	MM	DNC007422	Arzoxifene	SERM	hsa04540-hsa04917; hsa04540-hsa04915	0.0573562	0.340627	0.397984
DB04845	Ixabepilone	MM	DB00481	Raloxifene	SERM	hsa04540-hsa04917; hsa04540-hsa04915	0.0573562	0.340627	0.397984
DB01229	Paclitaxel	MM	DB04575	Quinestrol	SH	hsa04010-hsa04915; hsa04540-hsa04915; hsa04066-hsa04915	0.0911317	0.318247	0.397984
DCL000527	Figitumumab	IGFR1i	DCL000486	AZD8931	HER2	hsa04151-hsa04066; sa04114-hsa04066; hsa04730-hsa04510; hsa04913-hsa04066; hsa04914-hsa04066; hsa04066-hsa04012	0.198971	0.198224	0.397196
DCL000527	Figitumumab	IGFR1i	DB06366	Pertuzumab	HER2	hsa04151-hsa04066; sa04114-hsa04066; hsa04730-hsa04510; hsa04913-hsa04066; hsa04914-hsa04066; hsa04066-hsa04012	0.198971	0.198224	0.397196
DCL000527	Figitumumab	IGFR1i	DB00072	Trastuzumab	HER2	hsa04151-hsa04066; sa04114-hsa04066; hsa04730-hsa04510; hsa04913-hsa04066; hsa04914-hsa04066; hsa04066-hsa04012	0.198971	0.198224	0.397196
DCL000578	Motesanib	MTKi 4	DB06616	Bosutinib	ABL1/SRC	hsa04060-hsa04012; hsa04370-hsa04012; hsa04370-hsa04722; hsa04540-hsa04012; hsa04810-hsa04012; hsa04810-hsa04722	0.259136	0.13792	0.397011
DB00947	Fulvestrant	SERM	DB03010	Epothilon	MM	hsa04917-hsa04540; hsa04915-hsa04540	0.339627	0.0573562	0.396983
DB00947	Fulvestrant	SERM	DB00361	Vinorelbine	MM	hsa04917-hsa04540; hsa04915-hsa04540	0.339627	0.0573562	0.396983
DB03010	Epothilon	MM	DB00539	Toremifene	SERM	hsa04540-hsa04917; hsa04540-hsa04915	0.0573562	0.339627	0.396983
DB00361	Vinorelbine	MM	DB00539	Toremifene	SERM	hsa04540-hsa04917; hsa04540-hsa04915	0.0573562	0.339627	0.396983
DB04845	Ixabepilone	MM	DB00539	Toremifene	SERM	hsa04540-hsa04917; hsa04540-hsa04915	0.0573562	0.339627	0.396983
DB04575	Quinestrol	SH	DB08871	Eribulin	MM	hsa04917-hsa04540; hsa04915-hsa04540	0.339627	0.0573562	0.396983
DB03010	Epothilon	MM	DB04575	Quinestrol	SH	hsa04917-hsa04540; hsa04915-hsa04540	0.0573562	0.339627	0.396983
DB00361	Vinorelbine	MM	DB04575	Quinestrol	SH	hsa04917-hsa04540; hsa04915-hsa04540	0.0573562	0.339627	0.396983
DB00947	Fulvestrant	SERM	DB04845	Ixabepilone	MM	hsa04917-hsa04540; hsa04915-hsa04540	0.339627	0.0573562	0.396983
DB00947	Fulvestrant	SERM	DB08871	Eribulin	MM	hsa04917-hsa04540; hsa04915-hsa04540	0.339627	0.0573562	0.396983
DB00675	Tamoxifen	SERM	DB08871	Eribulin	MM	hsa04917-hsa04540; hsa04915-hsa04540	0.339627	0.0573562	0.396983
DB00539	Toremifene	SERM	DB08871	Eribulin	MM	hsa04917-hsa04540; hsa04915-hsa04540	0.339627	0.0573562	0.396983
DNC007422	Arzoxifene	SERM	DB08871	Eribulin	MM	hsa04917-hsa04540; hsa04915-hsa04540	0.339627	0.0573562	0.396983
DB00481	Raloxifene	SERM	DB08871	Eribulin	MM	hsa04917-hsa04540; hsa04915-hsa04540	0.339627	0.0573562	0.396983
DB04845	Ixabepilone	MM	DB04575	Quinestrol	SH	hsa04917-hsa04540; hsa04915-hsa04540	0.0573562	0.339627	0.396983
DB06616	Bosutinib	ABL1/SRC	DB00947	Fulvestrant	SERM	hsa04012-hsa04915; hsa04722-hsa04915	0.00519307	0.250782	0.396376
DB06616	Bosutinib	ABL1/SRC	DB00675	Tamoxifen	SERM	hsa04012-hsa04915; hsa04722-hsa04915	0.00519307	0.250782	0.396376
DB06616	Bosutinib	ABL1/SRC	DB00539	Toremifene	SERM	hsa04012-hsa04915; hsa04722-hsa04915	0.00519307	0.250782	0.396376
DB06616	Bosutinib	ABL1/SRC	DB04575	Quinestrol	SH	hsa04012-hsa04915; hsa04722-hsa04915	0.145193	0.250782	0.396376
DB00539	Toremifene	SERM	DB00014	Goserelin	SH	hsa04917-hsa04080; hsa04917-hsa04913; hsa04915-hsa04020; hsa04915-hsa04912; hsa04915-hsa04913	0.167366	0.227543	0.394909
DB04575	Quinestrol	SH	DB00014	Goserelin	SH	hsa04917-hsa04080; hsa04917-hsa04913; hsa04915-hsa04020; hsa04915-hsa04912; hsa04915-hsa04913	0.167366	0.227543	0.394909
DCL000578	Motesanib	MTKi 4	DB00398	Sorafenib	MTKi 5	hsa04010-hsa04540; hsa04010-hsa04662; hsa04010-hsa04151; hsa04010-hsa04916; hsa04010-hsa04917; hsa04010-hsa04370; hsa04010-hsa04915; hsa04151-hsa04540; hhsa04151-hsa04720; hsa04151-hsa04666; hsa04151-hsa04726; hsa04151-hsa04916; hsa04151-hsa04370; hsa04151-hsa04912; hsa04151-hsa04914; hsa04151-hsa04650; hsa04151-hsa04730; hsa04151-hsa04270; hsa04020-hsa04370; hsa04020-hsa04912; hsa04916-hsa04060;…	0.0846813	0.375504	0.394289
DB01259	Lapatinib	EGFRi 2	DB00398	Sorafenib	MTKi 5	hsa04320-hsa04062; hsa04320-hsa04540; hsa04320-hsa04660; hsa04320-hsa04664; hsa04320-hsa04662; hsa04320-hsa04666; hsa04320-hsa04151; hsa04320-hsa04917; hsa04320-hsa04912; hsa04320-hsa04915; hsa04320-hsa04012; hsa04151-hsa04540; hsa04151-hsa04066; hsa04151-hsa04720; hsa04151-hsa04666; hsa04151-hsa04726; hsa04151-hsa04916; hsa04151-hsa04370; hsa04151-hsa04912; hsa04151-hsa04914; hsa04151-hsa04915; …	0.101259	0.322567	0.390854
DB08916	Afatinib	EGFRi 2	DB00398	Sorafenib	MTKi 5	hsa04320-hsa04062; hsa04320-hsa04540; hsa04320-hsa04660; hsa04320-hsa04664; hsa04320-hsa04662; hsa04320-hsa04666; hsa04320-hsa04151; hsa04320-hsa04917; hsa04320-hsa04912; hsa04320-hsa04915; hsa04320-hsa04012; hsa04151-hsa04540; hsa04151-hsa04066; hsa04151-hsa04720; hsa04151-hsa04666; hsa04151-hsa04726; hsa04151-hsa04916; hsa04151-hsa04370; hsa04151-hsa04912; hsa04151-hsa04914; hsa04151-hsa04915; …	0.101259	0.322567	0.390854
DCL000527	Figitumumab	IGFR1i	DB00351	Megestrol	SH	hsa04151-hsa04914; hsa04730-hsa04914; hsa04913-hsa04114; hsa04913-hsa04914; hsa04066-hsa04914	0.390541	0	0.390541
DB00317	Gefitinib	EGFRi	DB00398	Sorafenib	MTKi 5	hsa04320-hsa04062; hsa04320-hsa04540; hsa04320-hsa04660; hsa04320-hsa04664; hsa04320-hsa04662; hsa04320-hsa04666; hsa04320-hsa04151; hsa04320-hsa04917; hsa04320-hsa04912; hsa04320-hsa04915; hsa04320-hsa04012; hsa04151-hsa04540; hsa04151-hsa04720; hsa04151-hsa04666; hsa04151-hsa04726; hsa04151-hsa04916; hsa04151-hsa04370; hsa04151-hsa04912; hsa04151-hsa04914; hsa04151-hsa04915; hsa04151-hsa04012; …	0.122358	0.322567	0.390491
DB00530	Erlotinib	EGFRi	DB00398	Sorafenib	MTKi 5	hsa04320-hsa04062; hsa04320-hsa04540; hsa04320-hsa04660; hsa04320-hsa04664; hsa04320-hsa04662; hsa04320-hsa04666; hsa04320-hsa04151; hsa04320-hsa04917; hsa04320-hsa04912; hsa04320-hsa04915; hsa04320-hsa04012; hsa04151-hsa04540; hsa04151-hsa04720; hsa04151-hsa04666; hsa04151-hsa04726; hsa04151-hsa04916; hsa04151-hsa04370; hsa04151-hsa04912; hsa04151-hsa04914; hsa04151-hsa04915; hsa04151-hsa04012; …	0.122358	0.322567	0.390491
DCL000578	Motesanib	MTKi 4	DCL001085	BEZ235	mTOR/PI3K	hsa04151-hsa04066; hsa04151-hsa04150; hsa04151-hsa04370; hsa04151-hsa04210; hsa04151-hsa04920; hsa04510-hsa04150; hsa04510-hsa04370; hhsa04916-hsa04660; hsa04916-hsa04662; hsa04916-hsa04151; hsa04916-hsa04370; hsa04060-hsa04066; hsa04370-hsa04380; hsa04370-hsa04062; hsa04370-hsa04066; hsa04370-hsa04620; hsa04370-hsa04910; hsa04370-hsa04660; hsa04370-hsa04664; hsa04370-hsa04662; hsa04370-hsa04722;…	0.178071	0.195477	0.390338
DCL000578	Motesanib	MTKi 4	DCL001086	BGT226	mTOR/PI3K	hsa04151-hsa04066; hsa04151-hsa04150; hsa04151-hsa04370; hsa04151-hsa04210; hsa04151-hsa04920; hsa04510-hsa04150; hsa04510-hsa04370; hhsa04916-hsa04660; hsa04916-hsa04662; hsa04916-hsa04151; hsa04916-hsa04370; hsa04060-hsa04066; hsa04370-hsa04380; hsa04370-hsa04062; hsa04370-hsa04066; hsa04370-hsa04620; hsa04370-hsa04910; hsa04370-hsa04660; hsa04370-hsa04664; hsa04370-hsa04662; hsa04370-hsa04722;…	0.178071	0.195477	0.390338
DB08875	Cabozantinib	MTKi 3	DB01248	Docetaxel	MM	hsa04151-hsa04540; hsa04060-hsa04540; hsa04370-hsa04540; hsa04144-hsa04145;	0.332709	0.0666465	0.390013
DB00317	Gefitinib	EGFRi	DCL001087	BKM120	PI3K	hsa04320-hsa04915; hsa04320-hsa04012; hsa04151-hsa04066; hsa04151-hsa04915; hsa04151-hsa04012; hsa04060-hsa04012; hsa04912-hsa04062; hsa04912-hsa04725; hsa04912-hsa04151; hsa04912-hsa04915; hsa04912-hsa04012; hsa04540-hsa04066; hsa04540-hsa04915; hsa04540-hsa04012; hsa04066-hsa04915; hsa04066-hsa04012; hsa04915-hsa04062; hsa04915-hsa04620; hsa04915-hsa04910; hsa04915-hsa04660; hsa04915-hsa04664;p…	0.225243	0.183861	0.389794
DB00530	Erlotinib	EGFRi	DCL001087	BKM120	PI3K	hsa04320-hsa04915; hsa04320-hsa04012; hsa04151-hsa04066; hsa04151-hsa04915; hsa04151-hsa04012; hsa04060-hsa04012; hsa04912-hsa04062; hsa04912-hsa04725; hsa04912-hsa04151; hsa04912-hsa04915; hsa04912-hsa04012; hsa04540-hsa04066; hsa04540-hsa04915; hsa04540-hsa04012; hsa04066-hsa04915; hsa04066-hsa04012; hsa04915-hsa04062; hsa04915-hsa04620; hsa04915-hsa04910; hsa04915-hsa04660; hsa04915-hsa04664;p…	0.225243	0.183861	0.389794
DB08875	Cabozantinib	MTKi 3	DB01229	Paclitaxel	MM	hsa04151-hsa04540; hsa04060-hsa04540; hsa04370-hsa04540; hsa04144-hsa04145;	0.332709	0.0560286	0.384533
DB00317	Gefitinib	EGFRi	DCL000242	Tanespimycin	HSPi 1	hsa04320-hsa04914; hsa04320-hsa04915; hsa04151-hsa04914; hsa04912-hsa04151; hsa04912-hsa04914; hsa04912-hsa04915; hsa04540-hsa04914; hsa04540-hsa04915; hsa04066-hsa04151; hsa04066-hsa04914; hsa04066-hsa04915; hsa04915-hsa04914; hsa04010-hsa04914; hsa04012-hsa04151; hsa04012-hsa04914; hsa04012-hsa04915; hsa04810-hsa04914; hsa04810-hsa04915	0.218647	0.179007	0.383589
DB00530	Erlotinib	EGFRi	DCL000242	Tanespimycin	HSPi 1	hsa04320-hsa04914; hsa04320-hsa04915; hsa04151-hsa04914; hsa04912-hsa04151; hsa04912-hsa04914; hsa04912-hsa04915; hsa04540-hsa04914; hsa04540-hsa04915; hsa04066-hsa04151; hsa04066-hsa04914; hsa04066-hsa04915; hsa04915-hsa04914; hsa04010-hsa04914; hsa04012-hsa04151; hsa04012-hsa04914; hsa04012-hsa04915; hsa04810-hsa04914; hsa04810-hsa04915	0.218647	0.179007	0.383589
DNC004815	Neratinib	EGFRi 3	DB00398	Sorafenib	MTKi 5	hsa04320-hsa04062; hsa04320-hsa04540; hsa04320-hsa04660; hsa04320-hsa04664; hsa04320-hsa04662; hsa04320-hsa04666; hsa04320-hsa04151; hsa04320-hsa04917; hsa04320-hsa04912; hsa04320-hsa04915; hsa04320-hsa04012; hsa04151-hsa04540; hsa04151-hsa04720; hsa04151-hsa04666; hsa04151-hsa04726; hsa04151-hsa04916; hsa04151-hsa04370; hsa04151-hsa04912; hsa04151-hsa04914; hsa04151-hsa04915; hsa04151-hsa04012; …	0.138416	0.337176	0.382432
DCL000578	Motesanib	MTKi 4	DCL001087	BKM120	PI3K	hsa04151-hsa04370; hsa04510-hsa04370; hsa04916-hsa04660; hsa04916-hsa04664; hsa04916-hsa04662; hsa04916-hsa04151; hsa04060-hsa04370; hsa04370-hsa04380; hsa04370-hsa04066; hsa04370-hsa04620; hsa04370-hsa04910; hsa04370-hsa04660; hsa04370-hsa04664; hsa04370-hsa04662; hsa04370-hsa04722; hsa04370-hsa04668; hsa04370-hsa04666; hsa04370-hsa04810; hsa04370-hsa04725; hsa04370-hsa04917; hsa04370-hsa04915; …	0.179457	0.167451	0.382202
DCL000350	Vandetanib	EGFRi 3	DB00398	Sorafenib	MTKi 5	hsa04320-hsa04062; hsa04320-hsa04540; hsa04320-hsa04660; hsa04320-hsa04664; hsa04320-hsa04662; hsa04320-hsa04666; hsa04320-hsa04917; hsa04320-hsa04912; hsa04320-hsa04915; hsa04320-hsa04012; hsa04151-hsa04540; hsa04151-hsa04720; hsa04151-hsa04666; hsa04151-hsa04726; hsa04151-hsa04916; hsa04151-hsa04370; hsa04151-hsa04912; hsa04151-hsa04914; hsa04151-hsa04915; hsa04151-hsa04012; hsa04151-hsa04650; …	0.12836	0.337176	0.382108
DAP000840	Dromostanolone	SH	DCL000527	Figitumumab	IGFR1i	hsa04114-hsa04151; hsa04114-hsa04730; hsa04114-hsa04913; hsa04114-hsa04914	0	0.381738	0.381738
DB00675	Tamoxifen	SERM	DB08916	Afatinib	EGFRi 2	hsa04917-hsa04066; hsa04917-hsa04915; hsa04915-hsa04320; hsa04915-hsa04151; hsa04915-hsa04912; hsa04915-hsa04540; hsa04915-hsa04066; hsa04915-hsa04010; hsa04915-hsa04012; hsa04915-hsa04020; hsa04915-hsa04810	0.190311	0.241026	0.381046
DNC007422	Arzoxifene	SERM	DB01259	Lapatinib	EGFRi 2	hsa04917-hsa04066; hsa04917-hsa04915; hsa04915-hsa04320; hsa04915-hsa04151; hsa04915-hsa04912; hsa04915-hsa04540; hsa04915-hsa04066; hsa04915-hsa04010; hsa04915-hsa04012; hsa04915-hsa04020; hsa04915-hsa04810	0.190311	0.241026	0.381046
DNC007422	Arzoxifene	SERM	DB08916	Afatinib	EGFRi 2	hsa04917-hsa04066; hsa04917-hsa04915; hsa04915-hsa04320; hsa04915-hsa04151; hsa04915-hsa04912; hsa04915-hsa04540; hsa04915-hsa04066; hsa04915-hsa04010; hsa04915-hsa04012; hsa04915-hsa04020; hsa04915-hsa04810	0.190311	0.241026	0.381046
DB00481	Raloxifene	SERM	DB01259	Lapatinib	EGFRi 2	hsa04917-hsa04066; hsa04917-hsa04915; hsa04915-hsa04320; hsa04915-hsa04151; hsa04915-hsa04912; hsa04915-hsa04540; hsa04915-hsa04066; hsa04915-hsa04010; hsa04915-hsa04012; hsa04915-hsa04020; hsa04915-hsa04810	0.190311	0.241026	0.381046
DB00481	Raloxifene	SERM	DB08916	Afatinib	EGFRi 2	hsa04917-hsa04066; hsa04917-hsa04915; hsa04915-hsa04320; hsa04915-hsa04151; hsa04915-hsa04912; hsa04915-hsa04540; hsa04915-hsa04066; hsa04915-hsa04010; hsa04915-hsa04012; hsa04915-hsa04020; hsa04915-hsa04810	0.190311	0.241026	0.381046
DB04575	Quinestrol	SH	DB01259	Lapatinib	EGFRi 2	hsa04917-hsa04066; hsa04917-hsa04915; hsa04915-hsa04320; hsa04915-hsa04912; hsa04915-hsa04540; hsa04915-hsa04066; hsa04915-hsa04010; hsa04915-hsa04012; hsa04915-hsa04020; hsa04915-hsa04810	0.104764	0.241026	0.381046
DB04575	Quinestrol	SH	DB08916	Afatinib	EGFRi 2	hsa04917-hsa04066; hsa04917-hsa04915; hsa04915-hsa04320; hsa04915-hsa04912; hsa04915-hsa04540; hsa04915-hsa04066; hsa04915-hsa04010; hsa04915-hsa04012; hsa04915-hsa04020; hsa04915-hsa04810	0.104764	0.241026	0.381046
DCL001085	BEZ235	mTOR/PI3K	DCL001086	BGT226	mTOR/PI3K	hsa04380-hsa04066; hsa04380-hsa04012; hsa04062-hsa04910; hsa04066-hsa04910; hsa04066-hsa04662; hsa04066-hsa04668; hsa04066-hsa04666; hsa04066-hsa04810; hsa04066-hsa04725; hsa04066-hsa04150; hsa04066-hsa04917; hsa04066-hsa04370; hsa04066-hsa04915; hsa04066-hsa04210; hsa04066-hsa04630; hsa04910-hsa04664; hsa04910-hsa04722; hsa04910-hsa04150; hsa04910-hsa04370; hsa04910-hsa04914; hsa04910-hsa04210; …	0.379765	0.379765	0.379765
DB06616	Bosutinib	ABL1/SRC	DB00072	Trastuzumab	HER2	hsa04151-hsa04066; hsa04151-hsa04660; hsa04151-hsa04150; hsa04151-hsa04370; hsa04151-hsa04210; hsa04151-hsa04920; hsa04510-hsa04150; hsa04510-hsa04370; hsa04510-hsa04630; hsa04020-hsa04722; hsa04916-hsa04664; hsa04916-hsa04151; hsa04060-hsa04370; hsa04370-hsa04380; hsa04370-hsa04062; hsa04370-hsa04066; hsa04370-hsa04620; hsa04370-hsa04910; hsa04370-hsa04660; hsa04370-hsa04664; hsa04370-hsa04662; …	0.10144	0.277169	0.378609
DB06616	Bosutinib	ABL1/SRC	DCL000486	AZD8931	HER2	hsa04151-hsa04066; hsa04151-hsa04660; hsa04151-hsa04150; hsa04151-hsa04370; hsa04151-hsa04210; hsa04151-hsa04920; hsa04510-hsa04150; hsa04510-hsa04370; hsa04510-hsa04630; hsa04020-hsa04722; hsa04916-hsa04664; hsa04916-hsa04151; hsa04060-hsa04370; hsa04370-hsa04380; hsa04370-hsa04062; hsa04370-hsa04066; hsa04370-hsa04620; hsa04370-hsa04910; hsa04370-hsa04660; hsa04370-hsa04664; hsa04370-hsa04662; …	0.10144	0.277169	0.378609
DB06616	Bosutinib	ABL1/SRC	DB06366	Pertuzumab	HER2	hsa04151-hsa04066; hsa04151-hsa04660; hsa04151-hsa04150; hsa04151-hsa04370; hsa04151-hsa04210; hsa04151-hsa04920; hsa04510-hsa04150; hsa04510-hsa04370; hsa04510-hsa04630; hsa04020-hsa04722; hsa04916-hsa04664; hsa04916-hsa04151; hsa04060-hsa04370; hsa04370-hsa04380; hsa04370-hsa04062; hsa04370-hsa04066; hsa04370-hsa04620; hsa04370-hsa04910; hsa04370-hsa04660; hsa04370-hsa04664; hsa04370-hsa04662; …	0.10144	0.277169	0.378609
DNC004815	Neratinib	EGFRi 3	DCL001085	BEZ235	mTOR/PI3K	hsa04320-hsa04915; hsa04320-hsa04012; hsa04151-hsa04066; hsa04151-hsa04150; hsa04151-hsa04370; hsa04151-hsa04915; hsa04151-hsa04920; hsa04151-hsa04012; hsa04510-hsa04370; hsa04060-hsa04066; hsa04060-hsa04370; hsa04060-hsa04012; hsa04370-hsa04380; hsa04370-hsa04066; hsa04370-hsa04910; hsa04370-hsa04660; hsa04370-hsa04664; hsa04370-hsa04662; hsa04370-hsa04722; hsa04370-hsa04668; hsa04370-hsa04666; …	0.223457	0.151606	0.374588
DNC004815	Neratinib	EGFRi 3	DCL001086	BGT226	mTOR/PI3K	hsa04320-hsa04915; hsa04320-hsa04012; hsa04151-hsa04066; hsa04151-hsa04150; hsa04151-hsa04370; hsa04151-hsa04915; hsa04151-hsa04920; hsa04151-hsa04012; hsa04510-hsa04370; hsa04060-hsa04066; hsa04060-hsa04370; hsa04060-hsa04012; hsa04370-hsa04380; hsa04370-hsa04066; hsa04370-hsa04910; hsa04370-hsa04660; hsa04370-hsa04664; hsa04370-hsa04662; hsa04370-hsa04722; hsa04370-hsa04668; hsa04370-hsa04666; …	0.223457	0.151606	0.374588
DCL000350	Vandetanib	EGFRi 3	DCL001085	BEZ235	mTOR/PI3K	hsa04320-hsa04915; hsa04320-hsa04012; hsa04151-hsa04066; hsa04151-hsa04150; hsa04151-hsa04370; hsa04151-hsa04915; hsa04151-hsa04920; hsa04151-hsa04012; hsa04510-hsa04370; hsa04060-hsa04066; hsa04060-hsa04370; hsa04060-hsa04012; hsa04370-hsa04380; hsa04370-hsa04066; hsa04370-hsa04910; hsa04370-hsa04660; hsa04370-hsa04664; hsa04370-hsa04662; hsa04370-hsa04722; hsa04370-hsa04668; hsa04370-hsa04666; …	0.224064	0.151606	0.374363
DCL000350	Vandetanib	EGFRi 3	DCL001086	BGT226	mTOR/PI3K	hsa04320-hsa04915; hsa04320-hsa04012; hsa04151-hsa04066; hsa04151-hsa04150; hsa04151-hsa04370; hsa04151-hsa04915; hsa04151-hsa04920; hsa04151-hsa04012; hsa04510-hsa04370; hsa04060-hsa04066; hsa04060-hsa04370; hsa04060-hsa04012; hsa04370-hsa04380; hsa04370-hsa04066; hsa04370-hsa04910; hsa04370-hsa04660; hsa04370-hsa04664; hsa04370-hsa04662; hsa04370-hsa04722; hsa04370-hsa04668; hsa04370-hsa04666; …	0.224064	0.151606	0.374363
DB08916	Afatinib	EGFRi 2	DCL001087	BKM120	PI3K	hsa04320-hsa04915; hsa04320-hsa04012; hsa04151-hsa04066; hsa04151-hsa04012; hsa04060-hsa04012; hsa04912-hsa04066; hsa04912-hsa04915; hsa04912-hsa04012; hsa04540-hsa04066; hsa04540-hsa04012; hsa04066-hsa04062; hsa04066-hsa04620; hsa04066-hsa04660; hsa04066-hsa04662; hsa04066-hsa04668; hsa04066-hsa04917; hsa04066-hsa04915; hsa04066-hsa04012; hsa04066-hsa04630;hsa04915-hsa04660; hsa04915-hsa04664; h…	0.223738	0.183679	0.372773
DB08916	Afatinib	EGFRi 2	DB01248	Docetaxel	MM	hsa04320-hsa04540; hsa04912-hsa04540; hsa04915-hsa04010; hsa04915-hsa04540; hsa04012-hsa04010	0.290463	0.140847	0.370275
DCL000357	SU-14813	MTKi 2	DCL000242	Tanespimycin	HSPi 1	hsa04151-hsa04914; hsa04510-hsa04914; hsa04370-hsa04151; hsa04370-hsa04914; hsa04370-hsa04915	0.236738	0.13915	0.370059
DCL000354	Cediranib	MTKi 2	DCL000242	Tanespimycin	HSPi 1	hsa04151-hsa04914; hsa04510-hsa04914; hsa04370-hsa04151; hsa04370-hsa04914; hsa04370-hsa04915	0.236738	0.13915	0.370059
DB00675	Tamoxifen	SERM	DCL000486	AZD8931	HER2	hsa04915-hsa04510; hsa04915-hsa04012; hsa04915-hsa04020; hsa04915-hsa04066;	0.2441	0.119912	0.363637
DB00675	Tamoxifen	SERM	DB06366	Pertuzumab	HER2	hsa04915-hsa04510; hsa04915-hsa04012; hsa04915-hsa04020; hsa04915-hsa04066;	0.2441	0.119912	0.363637
DNC007422	Arzoxifene	SERM	DCL000486	AZD8931	HER2	hsa04915-hsa04510; hsa04915-hsa04012; hsa04915-hsa04020; hsa04915-hsa04066;	0.2441	0.119912	0.363637
DNC007422	Arzoxifene	SERM	DB06366	Pertuzumab	HER2	hsa04915-hsa04510; hsa04915-hsa04012; hsa04915-hsa04020; hsa04915-hsa04066;	0.2441	0.119912	0.363637
DB00481	Raloxifene	SERM	DCL000486	AZD8931	HER2	hsa04915-hsa04510; hsa04915-hsa04012; hsa04915-hsa04020; hsa04915-hsa04066;	0.2441	0.119912	0.363637
DB00481	Raloxifene	SERM	DB06366	Pertuzumab	HER2	hsa04915-hsa04510; hsa04915-hsa04012; hsa04915-hsa04020; hsa04915-hsa04066;	0.2441	0.119912	0.363637
DB08875	Cabozantinib	MTKi 3	DB00398	Sorafenib	MTKi 5	hsa04151-hsa04540; hsa04151-hsa04720; hsa04151-hsa04666; hsa04151-hsa04726; hsa04151-hsa04916; hsa04151-hsa04370; hsa04151-hsa04912; hsa04151-hsa04914; hsa04151-hsa04650; hsa04151-hsa04730; hsa04151-hsa04270; hsa04060-hsa04540; hsa04060-hsa04916; hsa04060-hsa04370; hsa04370-hsa04062; hsa04370-hsa04540; hsa04370-hsa04910; hsa04370-hsa04660; hsa04370-hsa04020; hsa04370-hsa04664; hsa04370-hsa04662; …	0.122015	0.291582	0.362017
DB06366	Pertuzumab	HER2	DCL001087	BKM120	PI3K	hsa04510-hsa04012; hsa04012-hsa04380; hsa04012-hsa04066; hsa04012-hsa04664; hsa04012-hsa04725; hsa04012-hsa04150; hsa04012-hsa04210; hsa04066-hsa04062; hsa04066-hsa04620; hsa04066-hsa04910; hsa04066-hsa04660; hsa04066-hsa04664; hsa04066-hsa04662; hsa04066-hsa04668; hsa04066-hsa04666; hsa04066-hsa04725; hsa04066-hsa04150; hsa04066-hsa04917; hsa04066-hsa04370; hsa04066-hsa04210; hsa04066-hsa04650; …	0.167379	0.194498	0.360112
DCL000486	AZD8931	HER2	DCL001087	BKM120	PI3K	hsa04510-hsa04012; hsa04012-hsa04380; hsa04012-hsa04066; hsa04012-hsa04664; hsa04012-hsa04725; hsa04012-hsa04150; hsa04012-hsa04210; hsa04066-hsa04062; hsa04066-hsa04620; hsa04066-hsa04910; hsa04066-hsa04660; hsa04066-hsa04664; hsa04066-hsa04662; hsa04066-hsa04668; hsa04066-hsa04666; hsa04066-hsa04725; hsa04066-hsa04150; hsa04066-hsa04917; hsa04066-hsa04370; hsa04066-hsa04210; hsa04066-hsa04650; …	0.167379	0.194498	0.360112
DB01229	Paclitaxel	MM	DCL000242	Tanespimycin	HSPi 1	hsa04010-hsa04914; hsa04010-hsa04915; hsa04010-hsa04141; hsa04540-hsa04914	0.0626655	0.298126	0.360056
DCL000527	Figitumumab	IGFR1i	DCL000350	Vandetanib	EGFRi 3	hsa04151-hsa04320; hsa04151-hsa04370; hsa04151-hsa04912; hsa04151-hsa04540; hsa04151-hsa04066; hsa04151-hsa04915; hsa04151-hsa04012; hsa04510-hsa04370; hsa04510-hsa04915; hsa04114-hsa04915; hsa04730-hsa04151; hsa04730-hsa04370; hsa04730-hsa04912; hsa04730-hsa04066; hsa04730-hsa04915; hsa04913-hsa04151; hsa04913-hsa04066; hsa04913-hsa04915; hsa04914-hsa04151; hsa04914-hsa04370; hsa04914-hsa04066; …	0.166051	0.195055	0.360039
DCL000527	Figitumumab	IGFR1i	DNC004815	Neratinib	EGFRi 3	hsa04151-hsa04320; hsa04151-hsa04370; hsa04151-hsa04912; hsa04151-hsa04540; hsa04151-hsa04066; hsa04151-hsa04915; hsa04151-hsa04012; hsa04510-hsa04370; hsa04510-hsa04915; hsa04114-hsa04915; hsa04730-hsa04151; hsa04730-hsa04370; hsa04730-hsa04912; hsa04730-hsa04066; hsa04730-hsa04915; hsa04913-hsa04151; hsa04913-hsa04066; hsa04913-hsa04915; hsa04914-hsa04151; hsa04914-hsa04370; hsa04914-hsa04066; …	0.166051	0.195055	0.360039
DCL000354	Cediranib	MTKi 2	DCL001085	BEZ235	mTOR/PI3K	hsa04151-hsa04066; hsa04151-hsa04150; hsa04151-hsa04370; hsa04151-hsa04920; hsa04510-hsa04150; hsa04510-hsa04370; hsa04060-hsa04370; hsa04370-hsa04380; hsa04370-hsa04062; hsa04370-hsa04066; hsa04370-hsa04620; hsa04370-hsa04910; hsa04370-hsa04660; hsa04370-hsa04664; hsa04370-hsa04662; hsa04370-hsa04722; hsa04370-hsa04668; hsa04370-hsa04666; hsa04370-hsa04810; hsa04370-hsa04725; hsa04370-hsa04917; …	0.221538	0.1438	0.359534
DCL000357	SU-14813	MTKi 2	DCL001085	BEZ235	mTOR/PI3K	hsa04151-hsa04066; hsa04151-hsa04150; hsa04151-hsa04370; hsa04151-hsa04920; hsa04510-hsa04150; hsa04510-hsa04370; hsa04060-hsa04370; hsa04370-hsa04380; hsa04370-hsa04062; hsa04370-hsa04066; hsa04370-hsa04620; hsa04370-hsa04910; hsa04370-hsa04660; hsa04370-hsa04664; hsa04370-hsa04662; hsa04370-hsa04722; hsa04370-hsa04668; hsa04370-hsa04666; hsa04370-hsa04810; hsa04370-hsa04725; hsa04370-hsa04917; …	0.221538	0.1438	0.359534
DCL000357	SU-14813	MTKi 2	DCL001086	BGT226	mTOR/PI3K	hsa04151-hsa04066; hsa04151-hsa04150; hsa04151-hsa04370; hsa04151-hsa04920; hsa04510-hsa04150; hsa04510-hsa04370; hsa04060-hsa04370; hsa04370-hsa04380; hsa04370-hsa04062; hsa04370-hsa04066; hsa04370-hsa04620; hsa04370-hsa04910; hsa04370-hsa04660; hsa04370-hsa04664; hsa04370-hsa04662; hsa04370-hsa04722; hsa04370-hsa04668; hsa04370-hsa04666; hsa04370-hsa04810; hsa04370-hsa04725; hsa04370-hsa04917; …	0.221538	0.1438	0.359534
DCL000354	Cediranib	MTKi 2	DCL001086	BGT226	mTOR/PI3K	hsa04151-hsa04066; hsa04151-hsa04150; hsa04151-hsa04370; hsa04151-hsa04920; hsa04510-hsa04150; hsa04510-hsa04370; hsa04060-hsa04370; hsa04370-hsa04380; hsa04370-hsa04062; hsa04370-hsa04066; hsa04370-hsa04620; hsa04370-hsa04910; hsa04370-hsa04660; hsa04370-hsa04664; hsa04370-hsa04662; hsa04370-hsa04722; hsa04370-hsa04668; hsa04370-hsa04666; hsa04370-hsa04810; hsa04370-hsa04725; hsa04370-hsa04917; …	0.221538	0.1438	0.359534
DB00317	Gefitinib	EGFRi	DB03010	Epothilon	MM	hsa04320-hsa04540; hsa04151-hsa04540; hsa04060-hsa04540; hsa04912-hsa04540; hsa04066-hsa04540; hsa04915-hsa04540; hsa04012-hsa04540; hsa04810-hsa04540	0.291271	0.0701426	0.359199
DB00317	Gefitinib	EGFRi	DB00361	Vinorelbine	MM	hsa04320-hsa04540; hsa04151-hsa04540; hsa04060-hsa04540; hsa04912-hsa04540; hsa04066-hsa04540; hsa04915-hsa04540; hsa04012-hsa04540; hsa04810-hsa04540	0.291271	0.0701426	0.359199
DB00317	Gefitinib	EGFRi	DB04845	Ixabepilone	MM	hsa04320-hsa04540; hsa04151-hsa04540; hsa04060-hsa04540; hsa04912-hsa04540; hsa04066-hsa04540; hsa04915-hsa04540; hsa04012-hsa04540; hsa04810-hsa04540	0.291271	0.0701426	0.359199
DB00317	Gefitinib	EGFRi	DB08871	Eribulin	MM	hsa04320-hsa04540; hsa04151-hsa04540; hsa04060-hsa04540; hsa04912-hsa04540; hsa04066-hsa04540; hsa04915-hsa04540; hsa04012-hsa04540; hsa04810-hsa04540	0.291271	0.0701426	0.359199
DB00530	Erlotinib	EGFRi	DB03010	Epothilon	MM	hsa04320-hsa04540; hsa04151-hsa04540; hsa04060-hsa04540; hsa04912-hsa04540; hsa04066-hsa04540; hsa04915-hsa04540; hsa04012-hsa04540; hsa04810-hsa04540	0.291271	0.0701426	0.359199
DB00530	Erlotinib	EGFRi	DB00361	Vinorelbine	MM	hsa04320-hsa04540; hsa04151-hsa04540; hsa04060-hsa04540; hsa04912-hsa04540; hsa04066-hsa04540; hsa04915-hsa04540; hsa04012-hsa04540; hsa04810-hsa04540	0.291271	0.0701426	0.359199
DB00530	Erlotinib	EGFRi	DB04845	Ixabepilone	MM	hsa04320-hsa04540; hsa04151-hsa04540; hsa04060-hsa04540; hsa04912-hsa04540; hsa04066-hsa04540; hsa04915-hsa04540; hsa04012-hsa04540; hsa04810-hsa04540	0.291271	0.0701426	0.359199
DB00530	Erlotinib	EGFRi	DB08871	Eribulin	MM	hsa04320-hsa04540; hsa04151-hsa04540; hsa04060-hsa04540; hsa04912-hsa04540; hsa04066-hsa04540; hsa04915-hsa04540; hsa04012-hsa04540; hsa04810-hsa04540	0.291271	0.0701426	0.359199
DB06287	Temsirolimus	mTOR	DCL000242	Tanespimycin	HSPi 1	hsa04920-hsa04151; hsa04910-hsa04151; hsa04910-hsa04914; hsa04150-hsa04151; hsa04151-hsa04914; hsa04012-hsa04914; hsa04066-hsa04914; hsa04066-hsa04915	0.226082	0.133506	0.358105
DB01590	Everolimus	mTOR	DCL000242	Tanespimycin	HSPi 1	hsa04920-hsa04151; hsa04910-hsa04151; hsa04910-hsa04914; hsa04150-hsa04151; hsa04151-hsa04914; hsa04012-hsa04914; hsa04066-hsa04914; hsa04066-hsa04915	0.226082	0.133506	0.358105
DAP000840	Dromostanolone	SH	DB00072	Trastuzumab	HER2	hsa04114-hsa04510; hsa04114-hsa04012; hsa04114-hsa04020; hsa04114-hsa04066	0.317269	0.0478748	0.357269
DAP000840	Dromostanolone	SH	DCL000486	AZD8931	HER2	hsa04114-hsa04510; hsa04114-hsa04012; hsa04114-hsa04020; hsa04114-hsa04066	0.317269	0.0478748	0.357269
DAP000840	Dromostanolone	SH	DB06366	Pertuzumab	HER2	hsa04114-hsa04510; hsa04114-hsa04012; hsa04114-hsa04020; hsa04114-hsa04066	0.317269	0.0478748	0.357269
DCL001087	BKM120	PI3K	DCL001086	BGT226	mTOR/PI3K	hsa04380-hsa04066; hsa04380-hsa04012; hsa04062-hsa04910; hsa04066-hsa04910; hsa04066-hsa04662; hsa04066-hsa04668; hsa04066-hsa04666; hsa04066-hsa04810; hsa04066-hsa04725; hsa04066-hsa04150; hsa04066-hsa04917; hsa04066-hsa04370; hsa04066-hsa04915; hsa04066-hsa04210; hsa04066-hsa04630; hsa04910-hsa04664; hsa04910-hsa04722; hsa04910-hsa04150; hsa04910-hsa04370; hsa04910-hsa04210; hsa04910-hsa04012; …	0.204217	0.357122	0.357122
DCL001087	BKM120	PI3K	DCL001085	BEZ235	mTOR/PI3K	hsa04380-hsa04066; hsa04380-hsa04012; hsa04062-hsa04910; hsa04066-hsa04910; hsa04066-hsa04662; hsa04066-hsa04668; hsa04066-hsa04666; hsa04066-hsa04810; hsa04066-hsa04725; hsa04066-hsa04150; hsa04066-hsa04917; hsa04066-hsa04370; hsa04066-hsa04915; hsa04066-hsa04210; hsa04066-hsa04630; hsa04910-hsa04664; hsa04910-hsa04722; hsa04910-hsa04150; hsa04910-hsa04370; hsa04910-hsa04210; hsa04910-hsa04012; …	0.204217	0.357122	0.357122
DB06287	Temsirolimus	mTOR	DB00398	Sorafenib	MTKi 5	hsa04920-hsa04910; hsa04920-hsa04150; hsa04910-hsa04540; hsa04910-hsa04660; hsa04910-hsa04664; hsa04910-hsa04662; hsa04910-hsa04722; hsa04910-hsa04666; hsa04910-hsa04810; hsa04910-hsa04726; hsa04910-hsa04150; hsa04910-hsa04151; hsa04910-hsa04510; hsa04910-hsa04916; hsa04910-hsa04917; hsa04910-hsa04370; hsa04910-hsa04912; hsa04910-hsa04914; hsa04910-hsa04915; hsa04910-hsa04730; hsa04150-hsa04066; …	0.11019	0.266347	0.356008
DB01590	Everolimus	mTOR	DB00398	Sorafenib	MTKi 5	hsa04920-hsa04910; hsa04920-hsa04150; hsa04910-hsa04540; hsa04910-hsa04660; hsa04910-hsa04664; hsa04910-hsa04662; hsa04910-hsa04722; hsa04910-hsa04666; hsa04910-hsa04810; hsa04910-hsa04726; hsa04910-hsa04150; hsa04910-hsa04151; hsa04910-hsa04510; hsa04910-hsa04916; hsa04910-hsa04917; hsa04910-hsa04370; hsa04910-hsa04912; hsa04910-hsa04914; hsa04910-hsa04915; hsa04910-hsa04730; hsa04150-hsa04066; …	0.11019	0.266347	0.356008
DAP000840	Dromostanolone	SH	DB08875	Cabozantinib	MTKi 3	hsa04114-hsa04151; hsa04114-hsa04510; hsa04114-hsa04370	0.00297837	0.354919	0.354919
DCL000242	Tanespimycin	HSPi 1	DB00014	Goserelin	SH	hsa04151-hsa04917; hsa04914-hsa04917; hsa04914-hsa04912;	0.199511	0.153862	0.353374
DB08875	Cabozantinib	MTKi 3	DB03010	Epothilon	MM	hsa04151-hsa04540; hsa04060-hsa04540; hsa04370-hsa04540; hsa04144-hsa04145;	0.332709	0.0292827	0.352898
DB08875	Cabozantinib	MTKi 3	DB00361	Vinorelbine	MM	hsa04151-hsa04540; hsa04060-hsa04540; hsa04370-hsa04540; hsa04144-hsa04145;	0.332709	0.0292827	0.352898
DB08875	Cabozantinib	MTKi 3	DB04845	Ixabepilone	MM	hsa04151-hsa04540; hsa04060-hsa04540; hsa04370-hsa04540; hsa04144-hsa04145;	0.332709	0.0292827	0.352898
DB08875	Cabozantinib	MTKi 3	DB08871	Eribulin	MM	hsa04151-hsa04540; hsa04060-hsa04540; hsa04370-hsa04540; hsa04144-hsa04145;	0.332709	0.0292827	0.352898
DB06366	Pertuzumab	HER2	DCL001086	BGT226	mTOR/PI3K	hsa04012-hsa04380; hsa04012-hsa04910; hsa04012-hsa04150; hsa04012-hsa04210; hsa04066-hsa04910; hsa04066-hsa04664; hsa04066-hsa04666; hsa04066-hsa04810; hsa04066-hsa04150; hsa04066-hsa04151; hsa04066-hsa04370; hsa04066-hsa04915	0.147379	0.204498	0.351876
DB06366	Pertuzumab	HER2	DCL001085	BEZ235	mTOR/PI3K	hsa04012-hsa04380; hsa04012-hsa04910; hsa04012-hsa04150; hsa04012-hsa04210; hsa04066-hsa04910; hsa04066-hsa04664; hsa04066-hsa04666; hsa04066-hsa04810; hsa04066-hsa04150; hsa04066-hsa04151; hsa04066-hsa04370; hsa04066-hsa04915	0.147379	0.204498	0.351876
DCL000486	AZD8931	HER2	DCL001086	BGT226	mTOR/PI3K	hsa04012-hsa04380; hsa04012-hsa04910; hsa04012-hsa04150; hsa04012-hsa04210; hsa04066-hsa04910; hsa04066-hsa04664; hsa04066-hsa04666; hsa04066-hsa04810; hsa04066-hsa04150; hsa04066-hsa04151; hsa04066-hsa04370; hsa04066-hsa04915	0.147379	0.204498	0.351876
DCL000486	AZD8931	HER2	DCL001085	BEZ235	mTOR/PI3K	hsa04012-hsa04380; hsa04012-hsa04910; hsa04012-hsa04150; hsa04012-hsa04210; hsa04066-hsa04910; hsa04066-hsa04664; hsa04066-hsa04666; hsa04066-hsa04810; hsa04066-hsa04150; hsa04066-hsa04151; hsa04066-hsa04370; hsa04066-hsa04915	0.147379	0.204498	0.351876
DB00947	Fulvestrant	SERM	DB08916	Afatinib	EGFRi 2	hsa04917-hsa04066; hsa04917-hsa04915; hsa04915-hsa04320; hsa04915-hsa04912; hsa04915-hsa04540; hsa04915-hsa04066; hsa04915-hsa04010; hsa04915-hsa04012; hsa04915-hsa04020; hsa04915-hsa04810	0.104764	0.241026	0.351046
DB00539	Toremifene	SERM	DB01259	Lapatinib	EGFRi 2	hsa04917-hsa04066; hsa04917-hsa04915; hsa04915-hsa04320; hsa04915-hsa04912; hsa04915-hsa04540; hsa04915-hsa04066; hsa04915-hsa04010; hsa04915-hsa04012; hsa04915-hsa04020; hsa04915-hsa04810	0.104764	0.241026	0.351046
DB00539	Toremifene	SERM	DB08916	Afatinib	EGFRi 2	hsa04917-hsa04066; hsa04917-hsa04915; hsa04915-hsa04320; hsa04915-hsa04912; hsa04915-hsa04540; hsa04915-hsa04066; hsa04915-hsa04010; hsa04915-hsa04012; hsa04915-hsa04020; hsa04915-hsa04810	0.104764	0.241026	0.351046
DB00072	Trastuzumab	HER2	DB00398	Sorafenib	MTKi 5	hsa04510-hsa04370; hsa04510-hsa04915; hsa04012-hsa04540; hsa04012-hsa04660; hsa04012-hsa04664; hsa04012-hsa04662; hsa04012-hsa04722; hsa04012-hsa04720; hsa04012-hsa04666; hsa04012-hsa04726; hsa04012-hsa04916; hsa04012-hsa04917; hsa04012-hsa04370; hsa04012-hsa04914; hsa04012-hsa04915; hsa04012-hsa04650; hsa04012-hsa04730; hsa04012-hsa04270; hsa04020-hsa04370; hsa04020-hsa04912; hsa04066-hsa04540; …	0.186078	0.182335	0.350878
DCL000486	AZD8931	HER2	DB00398	Sorafenib	MTKi 5	hsa04510-hsa04370; hsa04510-hsa04915; hsa04012-hsa04540; hsa04012-hsa04660; hsa04012-hsa04664; hsa04012-hsa04662; hsa04012-hsa04722; hsa04012-hsa04720; hsa04012-hsa04666; hsa04012-hsa04726; hsa04012-hsa04916; hsa04012-hsa04917; hsa04012-hsa04370; hsa04012-hsa04914; hsa04012-hsa04915; hsa04012-hsa04650; hsa04012-hsa04730; hsa04012-hsa04270; hsa04020-hsa04370; hsa04020-hsa04912; hsa04066-hsa04540; …	0.186078	0.182335	0.350878
DB06366	Pertuzumab	HER2	DB00398	Sorafenib	MTKi 5	hsa04510-hsa04370; hsa04510-hsa04915; hsa04012-hsa04540; hsa04012-hsa04660; hsa04012-hsa04664; hsa04012-hsa04662; hsa04012-hsa04722; hsa04012-hsa04720; hsa04012-hsa04666; hsa04012-hsa04726; hsa04012-hsa04916; hsa04012-hsa04917; hsa04012-hsa04370; hsa04012-hsa04914; hsa04012-hsa04915; hsa04012-hsa04650; hsa04012-hsa04730; hsa04012-hsa04270; hsa04020-hsa04370; hsa04020-hsa04912; hsa04066-hsa04540; …	0.186078	0.182335	0.350878
DCL000350	Vandetanib	EGFRi 3	DB01229	Paclitaxel	MM	hsa04320-hsa04540; hsa04912-hsa04540; hsa04066-hsa04540; hsa049121-hsa04540; hsa04915-hsa04540; hsa04012-hsa04540; hsa04810-hsa04540	0.26859	0.0821201	0.350267
DNC004815	Neratinib	EGFRi 3	DCL001087	BKM120	PI3K	hsa04320-hsa04915; hsa04320-hsa04012; hsa04151-hsa04066; hsa04151-hsa04370; hsa04151-hsa04915; hsa04151-hsa04012; hsa04060-hsa04066; hsa04060-hsa04370; hsa04060-hsa04012; hsa04370-hsa04380; hsa04370-hsa04062; hsa04370-hsa04066; hsa04370-hsa04910; hsa04370-hsa04660; hsa04370-hsa04664; hsa04370-hsa04662; hsa04370-hsa04722; hsa04370-hsa04668; hsa04370-hsa04666; hsa04370-hsa04810; hsa04370-hsa04725; …	0.223457	0.126626	0.350081
DB01248	Docetaxel	MM	DCL000242	Tanespimycin	HSPi 1	hsa04010-hsa04914; hsa04010-hsa04915; hsa04010-hsa04141; hsa04540-hsa04914	0.0702602	0.279527	0.349787
DCL000165	Midostaurin	MTKi 1	DCL000357	SU-14813	MTKi 2	hsa04060-hsa04370; hsa04540-hsa04370; hsa04066-hsa04370; hsa04020-hsa04370; hsa04725-hsa04370; hsa04510-hsa04370; hsa04916-hsa04370; hsa04370-hsa04151; hsa04010-hsa04370; hsa04012-hsa04370; hsa04650-hsa04370; hsa04730-hsa04370; hsa04270-hsa04370	0.149204	0.19978	0.348984
DCL000165	Midostaurin	MTKi 1	DCL000354	Cediranib	MTKi 2	hsa04060-hsa04370; hsa04540-hsa04370; hsa04066-hsa04370; hsa04020-hsa04370; hsa04725-hsa04370; hsa04510-hsa04370; hsa04916-hsa04370; hsa04370-hsa04151; hsa04010-hsa04370; hsa04012-hsa04370; hsa04650-hsa04370; hsa04730-hsa04370; hsa04270-hsa04370	0.149204	0.19978	0.348984
DB08875	Cabozantinib	MTKi 3	DCL001081	Dinaciclib	CDKi 1	hsa04151-hsa04115; hsa04151-hsa04110; hsa04510-hsa04540; hsa04370-hsa04151; hsa04370-hsa04114; hsa04370-hsa04540; hsa04370-hsa04914	0.186259	0.161762	0.348021
DCL000578	Motesanib	MTKi 4	DB00014	Goserelin	SH	hsa04020-hsa04912; hsa04916-hsa04912; hsa04370-hsa04020; hsa04370-hsa04917; hsa04370-hsa04912; hsa04810-hsa04917; hsa04810-hsa04912	0.310411	0.0362442	0.346655
DCL000165	Midostaurin	MTKi 1	DB06287	Temsirolimus	mTOR	hsa04066-hsa04910; hsa04066-hsa04150; hsa04725-hsa04012; hsa04725-hsa04066; hsa04728-hsa04910; hsa04150-hsa04920; hsa04150-hsa04910; hsa04150-hsa04151; hsa04150-hsa04012; hsa04370-hsa04910; hsa04370-hsa04066; hsa04960-hsa04910; hsa04960-hsa04150; hsa04012-hsa04910;	0.110674	0.239207	0.346359
DCL000165	Midostaurin	MTKi 1	DB01590	Everolimus	mTOR	hsa04066-hsa04910; hsa04066-hsa04150; hsa04725-hsa04012; hsa04725-hsa04066; hsa04728-hsa04910; hsa04150-hsa04920; hsa04150-hsa04910; hsa04150-hsa04151; hsa04150-hsa04012; hsa04370-hsa04910; hsa04370-hsa04066; hsa04960-hsa04910; hsa04960-hsa04150; hsa04012-hsa04910;	0.110674	0.239207	0.346359
DCL000357	SU-14813	MTKi 2	DCL001087	BKM120	PI3K	hsa04151-hsa04370; hsa04510-hsa04370; hsa04060-hsa04370; hsa04370-hsa04380; hsa04370-hsa04062; hsa04370-hsa04066; hsa04370-hsa04620; hsa04370-hsa04910; hsa04370-hsa04660; hsa04370-hsa04664; hsa04370-hsa04662; hsa04370-hsa04722; hsa04370-hsa04668; hsa04370-hsa04666; hsa04370-hsa04810; hsa04370-hsa04725; hsa04370-hsa04917; hsa04370-hsa04914; hsa04370-hsa04915; hsa04370-hsa04210; hsa04370-hsa04012; …	0.220502	0.125238	0.345704
DCL000354	Cediranib	MTKi 2	DCL001087	BKM120	PI3K	hsa04151-hsa04370; hsa04510-hsa04370; hsa04060-hsa04370; hsa04370-hsa04380; hsa04370-hsa04062; hsa04370-hsa04066; hsa04370-hsa04620; hsa04370-hsa04910; hsa04370-hsa04660; hsa04370-hsa04664; hsa04370-hsa04662; hsa04370-hsa04722; hsa04370-hsa04668; hsa04370-hsa04666; hsa04370-hsa04810; hsa04370-hsa04725; hsa04370-hsa04917; hsa04370-hsa04914; hsa04370-hsa04915; hsa04370-hsa04210; hsa04370-hsa04012; …	0.220502	0.125238	0.345704
DCL000578	Motesanib	MTKi 4	DCL001046	OGX-427	HSPi 2	hsa04510-hsa04370; hsa04916-hsa04370; hsa04060-hsa04010; hsa04060-hsa04370; hsa04540-hsa04010; hsa04540-hsa04370; hsa04810-hsa04010; hsa04810-hsa04370	0.240397	0.108305	0.344865
DCL000165	Midostaurin	MTKi 1	DB06616	Bosutinib	ABL1/SRC	hsa04060-hsa04012; hsa04540-hsa04012	0.240204	0.104428	0.344632
DCL000165	Midostaurin	MTKi 1	DCL000486	AZD8931	HER2	hsa04060-hsa04510; hsa04060-hsa04066; hsa04066-hsa04510; hsa04066-hsa04012; hsa04150-hsa04066; hsa04510-hsa04012; hsa04510-hsa04520; hsa04310-hsa04020; 0 hsa04010-hsa04510; hsa04010-hsa04066;	0.0987824	0.255275	0.343234
DCL000165	Midostaurin	MTKi 1	DB06366	Pertuzumab	HER2	hsa04060-hsa04510; hsa04060-hsa04066; hsa04066-hsa04510; hsa04066-hsa04012; hsa04150-hsa04066; hsa04510-hsa04012; hsa04510-hsa04520; hsa04310-hsa04020; 0 hsa04010-hsa04510; hsa04010-hsa04066;	0.0987824	0.255275	0.343234
DCL000165	Midostaurin	MTKi 1	DB00072	Trastuzumab	HER2	hsa04060-hsa04510; hsa04060-hsa04066; hsa04066-hsa04510; hsa04066-hsa04012; hsa04150-hsa04066; hsa04510-hsa04012; hsa04510-hsa04520; hsa04310-hsa04020; 0 hsa04010-hsa04510; hsa04010-hsa04066;	0.0987824	0.255275	0.343234
DB03010	Epothilon	MM	DB01259	Lapatinib	EGFRi 2	hsa04540-hsa04320; hsa04540-hsa04060; hsa04540-hsa04912; hsa04540-hsa04066; hsa04540-hsa04915; hsa04540-hsa04012; hsa04540-hsa04810	0.0502531	0.296205	0.341747
DB03010	Epothilon	MM	DB08916	Afatinib	EGFRi 2	hsa04540-hsa04320; hsa04540-hsa04060; hsa04540-hsa04912; hsa04540-hsa04066; hsa04540-hsa04915; hsa04540-hsa04012; hsa04540-hsa04810	0.0502531	0.296205	0.341747
DB04845	Ixabepilone	MM	DB08916	Afatinib	EGFRi 2	hsa04540-hsa04320; hsa04540-hsa04060; hsa04540-hsa04912; hsa04540-hsa04066; hsa04540-hsa04915; hsa04540-hsa04012; hsa04540-hsa04810	0.0502531	0.296205	0.341747
DB08871	Eribulin	MM	DB08916	Afatinib	EGFRi 2	hsa04540-hsa04320; hsa04540-hsa04060; hsa04540-hsa04912; hsa04540-hsa04066; hsa04540-hsa04915; hsa04540-hsa04012; hsa04540-hsa04810	0.0502531	0.296205	0.341747
DCL001085	BEZ235	mTOR/PI3K	DB06616	Bosutinib	ABL1/SRC	hsa04012-hsa04380; hsa04012-hsa04910; hsa04012-hsa04668; hsa04012-hsa04666; hsa04012-hsa04725; hsa04012-hsa04150; hsa04012-hsa04917; hsa04012-hsa04370; hsa04012-hsa04210; hsa04012-hsa04630; hsa04722-hsa04066; hsa04722-hsa04910; hsa04722-hsa04150	0.281232	0.0617317	0.341125
DCL001086	BGT226	mTOR/PI3K	DB06616	Bosutinib	ABL1/SRC	hsa04012-hsa04380; hsa04012-hsa04910; hsa04012-hsa04668; hsa04012-hsa04666; hsa04012-hsa04725; hsa04012-hsa04150; hsa04012-hsa04917; hsa04012-hsa04370; hsa04012-hsa04210; hsa04012-hsa04630; hsa04722-hsa04066; hsa04722-hsa04910; hsa04722-hsa04150	0.281232	0.0617317	0.341125
DCL000350	Vandetanib	EGFRi 3	DCL001087	BKM120	PI3K	hsa04320-hsa04915; hsa04320-hsa04012; hsa04151-hsa04066; hsa04151-hsa04370; hsa04151-hsa04915; hsa04151-hsa04012; hsa04060-hsa04066; hsa04060-hsa04370; hsa04060-hsa04012; hsa04370-hsa04380; hsa04370-hsa04062; hsa04370-hsa04066; hsa04370-hsa04910; hsa04370-hsa04660; hsa04370-hsa04664; hsa04370-hsa04662; hsa04370-hsa04722; hsa04370-hsa04668; hsa04370-hsa04666; hsa04370-hsa04810; hsa04370-hsa04725; …	0.221257	0.126626	0.340913
DB08875	Cabozantinib	MTKi 3	DCL001085	BEZ235	mTOR/PI3K	hsa04151-hsa04066; hsa04151-hsa04150; hsa04151-hsa04370; hsa04151-hsa04960; hsa04151-hsa04210; hsa04151-hsa04920; hsa04510-hsa04150; hsa04510-hsa04370; hsa04060-hsa04066; hsa04060-hsa04370; hsa04370-hsa04380; hsa04370-hsa04062; hsa04370-hsa04066; hsa04370-hsa04620; hsa04370-hsa04910; hsa04370-hsa04660; hsa04370-hsa04664; hsa04370-hsa04662; hsa04370-hsa04722; hsa04370-hsa04668; hsa04370-hsa04666; …	0.206434	0.138697	0.340131
DB08875	Cabozantinib	MTKi 3	DCL001086	BGT226	mTOR/PI3K	hsa04151-hsa04066; hsa04151-hsa04150; hsa04151-hsa04370; hsa04151-hsa04960; hsa04151-hsa04210; hsa04151-hsa04920; hsa04510-hsa04150; hsa04510-hsa04370; hsa04060-hsa04066; hsa04060-hsa04370; hsa04370-hsa04380; hsa04370-hsa04062; hsa04370-hsa04066; hsa04370-hsa04620; hsa04370-hsa04910; hsa04370-hsa04660; hsa04370-hsa04664; hsa04370-hsa04662; hsa04370-hsa04722; hsa04370-hsa04668; hsa04370-hsa04666; …	0.206434	0.138697	0.340131
DCL001085	BEZ235	mTOR/PI3K	DB01259	Lapatinib	EGFRi 2	hsa04380-hsa04066; hsa04380-hsa04012; hsa04062-hsa04912; hsa04062-hsa04915; hsa04066-hsa04151; hsa04066-hsa04060; hsa04066-hsa04540; hsa04066-hsa04915; hsa04066-hsa04010; hsa04066-hsa04012; hsa04066-hsa04810; hsa04620-hsa04915; hsa04910-hsa04912; hsa04910-hsa04066; hsa04910-hsa04915; hsa04910-hsa04012; hsa04910-hsa04810; hsa04660-hsa04915; hsa04660-hsa04810; hsa04664-hsa04915; hsa04662-hsa04066; …	0.149614	0.190483	0.340097
DCL001085	BEZ235	mTOR/PI3K	DB08916	Afatinib	EGFRi 2	hsa04380-hsa04066; hsa04380-hsa04012; hsa04062-hsa04912; hsa04062-hsa04915; hsa04066-hsa04151; hsa04066-hsa04060; hsa04066-hsa04540; hsa04066-hsa04915; hsa04066-hsa04010; hsa04066-hsa04012; hsa04066-hsa04810; hsa04620-hsa04915; hsa04910-hsa04912; hsa04910-hsa04066; hsa04910-hsa04915; hsa04910-hsa04012; hsa04910-hsa04810; hsa04660-hsa04915; hsa04660-hsa04810; hsa04664-hsa04915; hsa04662-hsa04066; …	0.149614	0.190483	0.340097
DCL001086	BGT226	mTOR/PI3K	DB01259	Lapatinib	EGFRi 2	hsa04380-hsa04066; hsa04380-hsa04012; hsa04062-hsa04912; hsa04062-hsa04915; hsa04066-hsa04151; hsa04066-hsa04060; hsa04066-hsa04540; hsa04066-hsa04915; hsa04066-hsa04010; hsa04066-hsa04012; hsa04066-hsa04810; hsa04620-hsa04915; hsa04910-hsa04912; hsa04910-hsa04066; hsa04910-hsa04915; hsa04910-hsa04012; hsa04910-hsa04810; hsa04660-hsa04915; hsa04660-hsa04810; hsa04664-hsa04915; hsa04662-hsa04066; …	0.149614	0.190483	0.340097
DCL001086	BGT226	mTOR/PI3K	DB08916	Afatinib	EGFRi 2	hsa04380-hsa04066; hsa04380-hsa04012; hsa04062-hsa04912; hsa04062-hsa04915; hsa04066-hsa04151; hsa04066-hsa04060; hsa04066-hsa04540; hsa04066-hsa04915; hsa04066-hsa04010; hsa04066-hsa04012; hsa04066-hsa04810; hsa04620-hsa04915; hsa04910-hsa04912; hsa04910-hsa04066; hsa04910-hsa04915; hsa04910-hsa04012; hsa04910-hsa04810; hsa04660-hsa04915; hsa04660-hsa04810; hsa04664-hsa04915; hsa04662-hsa04066; …	0.149614	0.190483	0.340097
DNC004815	Neratinib	EGFRi 3	DB01248	Docetaxel	MM	hsa04320-hsa04540; hsa04912-hsa04540; hsa04066-hsa04540; hsa049121-hsa04540; hsa04915-hsa04540; hsa04012-hsa04540; hsa04810-hsa04540	0.24459	0.0981125	0.340027
DB00317	Gefitinib	EGFRi	DCL001085	BEZ235	mTOR/PI3K	hsa04320-hsa04151; hsa04320-hsa04915; hsa04151-hsa04066; hsa04151-hsa04664; hsa04151-hsa04150; hsa04151-hsa04915; hsa04151-hsa04920; hsa04151-hsa04012; hsa04510-hsa04150; hsa04510-hsa04915; hsa04060-hsa04066; hsa04060-hsa04012; hsa04912-hsa04062; hsa04912-hsa04066; hsa04912-hsa04910; hsa04912-hsa04725; hsa04912-hsa04151; hsa04912-hsa04917; hsa04912-hsa04915; hsa04912-hsa04012; hsa04540-hsa04066;h…	0.218416	0.15409	0.339937
DB00317	Gefitinib	EGFRi	DCL001086	BGT226	mTOR/PI3K	hsa04320-hsa04151; hsa04320-hsa04915; hsa04151-hsa04066; hsa04151-hsa04664; hsa04151-hsa04150; hsa04151-hsa04915; hsa04151-hsa04920; hsa04151-hsa04012; hsa04510-hsa04150; hsa04510-hsa04915; hsa04060-hsa04066; hsa04060-hsa04012; hsa04912-hsa04062; hsa04912-hsa04066; hsa04912-hsa04910; hsa04912-hsa04725; hsa04912-hsa04151; hsa04912-hsa04917; hsa04912-hsa04915; hsa04912-hsa04012; hsa04540-hsa04066;h…	0.218416	0.15409	0.339937
DB00530	Erlotinib	EGFRi	DCL001085	BEZ235	mTOR/PI3K	hsa04320-hsa04151; hsa04320-hsa04915; hsa04151-hsa04066; hsa04151-hsa04664; hsa04151-hsa04150; hsa04151-hsa04915; hsa04151-hsa04920; hsa04151-hsa04012; hsa04510-hsa04150; hsa04510-hsa04915; hsa04060-hsa04066; hsa04060-hsa04012; hsa04912-hsa04062; hsa04912-hsa04066; hsa04912-hsa04910; hsa04912-hsa04725; hsa04912-hsa04151; hsa04912-hsa04917; hsa04912-hsa04915; hsa04912-hsa04012; hsa04540-hsa04066;h…	0.218416	0.15409	0.339937
DB00530	Erlotinib	EGFRi	DCL001086	BGT226	mTOR/PI3K	hsa04320-hsa04151; hsa04320-hsa04915; hsa04151-hsa04066; hsa04151-hsa04664; hsa04151-hsa04150; hsa04151-hsa04915; hsa04151-hsa04920; hsa04151-hsa04012; hsa04510-hsa04150; hsa04510-hsa04915; hsa04060-hsa04066; hsa04060-hsa04012; hsa04912-hsa04062; hsa04912-hsa04066; hsa04912-hsa04910; hsa04912-hsa04725; hsa04912-hsa04151; hsa04912-hsa04917; hsa04912-hsa04915; hsa04912-hsa04012; hsa04540-hsa04066;h…	0.218416	0.15409	0.339937
DB08875	Cabozantinib	MTKi 3	DCL001075	PD-0332991	CDKi 2	hsa04114-hsa04151; 0.148758062302731 hsa04114-hsa04110; hsa04914-hsa04110	0.287282	0.0551761	0.339872
DB03010	Epothilon	MM	DCL000242	Tanespimycin	HSPi 1	hsa04010-hsa04914; hsa04010-hsa04915; hsa04010-hsa04141; hsa04540-hsa04914	0.0581921	0.27801	0.339671
DB00361	Vinorelbine	MM	DCL000242	Tanespimycin	HSPi 1	hsa04010-hsa04914; hsa04010-hsa04915; hsa04010-hsa04141; hsa04540-hsa04914	0.0581921	0.27801	0.339671
DB04845	Ixabepilone	MM	DCL000242	Tanespimycin	HSPi 1	hsa04010-hsa04914; hsa04010-hsa04915; hsa04010-hsa04141; hsa04540-hsa04914	0.0581921	0.27801	0.339671
DB08871	Eribulin	MM	DCL000242	Tanespimycin	HSPi 1	hsa04010-hsa04914; hsa04010-hsa04915; hsa04010-hsa04141; hsa04540-hsa04914	0.0581921	0.27801	0.339671
DB06616	Bosutinib	ABL1/SRC	DB00014	Goserelin	SH	hsa04012-hsa04020; hsa04012-hsa04912; hsa04722-hsa04020;	0.109816	0.23392	0.339568
DNC004815	Neratinib	EGFRi 3	DB03010	Epothilon	MM	hsa04320-hsa04540; hsa04912-hsa04540; hsa04066-hsa04540; hsa049121-hsa04540; hsa04915-hsa04540; hsa04012-hsa04540; hsa04810-hsa04540	0.26859	0.0701426	0.337648
DNC004815	Neratinib	EGFRi 3	DB04845	Ixabepilone	MM	hsa04320-hsa04540; hsa04912-hsa04540; hsa04066-hsa04540; hsa049121-hsa04540; hsa04915-hsa04540; hsa04012-hsa04540; hsa04810-hsa04540	0.26859	0.0701426	0.337648
DNC004815	Neratinib	EGFRi 3	DB08871	Eribulin	MM	hsa04320-hsa04540; hsa04912-hsa04540; hsa04066-hsa04540; hsa049121-hsa04540; hsa04915-hsa04540; hsa04012-hsa04540; hsa04810-hsa04540	0.26859	0.0701426	0.337648
DCL000350	Vandetanib	EGFRi 3	DB03010	Epothilon	MM	hsa04320-hsa04540; hsa04912-hsa04540; hsa04066-hsa04540; hsa049121-hsa04540; hsa04915-hsa04540; hsa04012-hsa04540; hsa04810-hsa04540	0.26859	0.0701426	0.337648
DCL000350	Vandetanib	EGFRi 3	DB00361	Vinorelbine	MM	hsa04320-hsa04540; hsa04912-hsa04540; hsa04066-hsa04540; hsa049121-hsa04540; hsa04915-hsa04540; hsa04012-hsa04540; hsa04810-hsa04540	0.26859	0.0701426	0.337648
DCL000350	Vandetanib	EGFRi 3	DB04845	Ixabepilone	MM	hsa04320-hsa04540; hsa04912-hsa04540; hsa04066-hsa04540; hsa049121-hsa04540; hsa04915-hsa04540; hsa04012-hsa04540; hsa04810-hsa04540	0.26859	0.0701426	0.337648
DCL000350	Vandetanib	EGFRi 3	DB08871	Eribulin	MM	hsa04320-hsa04540; hsa04912-hsa04540; hsa04066-hsa04540; hsa049121-hsa04540; hsa04915-hsa04540; hsa04012-hsa04540; hsa04810-hsa04540	0.26859	0.0701426	0.337648
DB00947	Fulvestrant	SERM	DB00072	Trastuzumab	HER2	hsa04915-hsa04510; hsa04915-hsa04012; hsa04915-hsa04020; hsa04915-hsa04066;	0.238833	0.0991211	0.33711
DB00947	Fulvestrant	SERM	DCL000486	AZD8931	HER2	hsa04915-hsa04510; hsa04915-hsa04012; hsa04915-hsa04020; hsa04915-hsa04066;	0.238833	0.0991211	0.33711
DB00947	Fulvestrant	SERM	DB06366	Pertuzumab	HER2	hsa04915-hsa04510; hsa04915-hsa04012; hsa04915-hsa04020; hsa04915-hsa04066	0.238833	0.0991211	0.33711
DB04575	Quinestrol	SH	DCL000486	AZD8931	HER2	hsa04915-hsa04510; hsa04915-hsa04012; hsa04915-hsa04020; hsa04915-hsa04066;	0.238833	0.0991211	0.33711
DB04575	Quinestrol	SH	DB06366	Pertuzumab	HER2	hsa04915-hsa04510; hsa04915-hsa04012; hsa04915-hsa04020; hsa04915-hsa04066;	0.238833	0.0991211	0.33711
DB00539	Toremifene	SERM	DCL000486	AZD8931	HER2	hsa04915-hsa04510; hsa04915-hsa04012; hsa04915-hsa04020; hsa04915-hsa04066;	0.238833	0.0991211	0.33711
DB00539	Toremifene	SERM	DB06366	Pertuzumab	HER2	hsa04915-hsa04510; hsa04915-hsa04012; hsa04915-hsa04020; hsa04915-hsa04066;	0.238833	0.0991211	0.33711
DB08875	Cabozantinib	MTKi 3	DCL001087	BKM120	PI3K	hsa04151-hsa04370; hsa04510-hsa04370; hsa04060-hsa04370; hsa04370-hsa04066; hsa04370-hsa04620; hsa04370-hsa04910; hsa04370-hsa04660; hsa04370-hsa04664; hsa04370-hsa04662; hsa04370-hsa04722; hsa04370-hsa04668; hsa04370-hsa04666; hsa04370-hsa04810; hsa04370-hsa04725; hsa04370-hsa04917; hsa04370-hsa04914; hsa04370-hsa04915; hsa04370-hsa04210; hsa04370-hsa04012; hsa04370-hsa04650; hsa04370-hsa04630	0.208699	0.127488	0.336187
